1  
2  
3  
4  
5  
6  
7  
8  
9  
10  
11  
12  
13  
14  
15  
16  
17  
18  
19  
20  
21  
22  
23  
24  
25  
26  
27

**Expansion of CD10<sup>neg</sup> neutrophils and CD14<sup>+</sup>HLA-DR<sup>neg/low</sup> monocytes driving proinflammatory responses in patients with acute myocardial infarction**

Daniela Fraccarollo<sup>1\*</sup>, Jonas Neuser<sup>1</sup>, Julian Möller<sup>1</sup>, Christian Riehle<sup>1</sup>, Paolo Galuppo<sup>1</sup>, Johann Bauersachs<sup>1</sup>

<sup>1</sup>Department of Cardiology and Angiology, Hannover Medical School, Hannover, Germany

**Author Notes**

Daniela Fraccarollo and Jonas Neuser are co–first authors.  
Paolo Galuppo and Johann Bauersachs are co–senior authors.

**Fraccarollo et al.: Immature CD10<sup>neg</sup> neutrophils/ HLA-DR<sup>neg/low</sup> monocytes in AMI**

**\*Corresponding author:**  
Dr. Daniela Fraccarollo  
Department of Cardiology and Angiology  
Medical School Hannover  
Carl-Neuberg-Str.1  
30625 Hannover, Germany  
Phone: (+49) 5115325773  
Fax: (+49) 5115328194  
e-mail: [fraccarollo.daniela@mh-hannover.de](mailto:fraccarollo.daniela@mh-hannover.de)

28 **ABSTRACT**

29 Immature neutrophils and HLA-DR<sup>neg/low</sup> monocytes expand in cancer, autoimmune diseases  
30 and viral infections, but their appearance and functional characteristics after acute myocardial  
31 infarction (AMI) remain underexplored. We found an expansion of circulating immature  
32 CD16<sup>+</sup>CD66b<sup>+</sup>CD10<sup>neg</sup> neutrophils and CD14<sup>+</sup>HLA-DR<sup>neg/low</sup> monocytes in patients with  
33 AMI, correlating with cardiac damage, function and serum levels of immune-inflammation  
34 markers. Increased frequency of immature CD10<sup>neg</sup> neutrophils and elevated circulating levels  
35 of IFN- $\gamma$  were linked, mainly in cytomegalovirus (CMV)-seropositive patients with high anti-  
36 CMV antibody titers and expanded CD4<sup>+</sup>CD28<sup>null</sup> T-cells. At a mechanistic level, CD10<sup>neg</sup>  
37 neutrophils enhance IFN- $\gamma$  production by CD4<sup>+</sup> T-cells through induction of interleukin-12.  
38 Moreover, we showed that HLA-DR<sup>neg/low</sup> monocytes are not immunosuppressive but secrete  
39 high levels of pro-inflammatory cytokines after differentiation to macrophages and IFN- $\gamma$   
40 stimulation. Thus, the immunoregulatory functions of immature CD10<sup>neg</sup> neutrophils play a  
41 dynamic role in mechanisms linking myeloid cell compartment dysregulation, Th1-type  
42 immune responses and inflammation in patients with AMI.

## 43 INTRODUCTION

44 Despite advances in interventional therapies patients with large acute myocardial infarction  
45 (AMI) are at higher risk of heart failure morbidity and mortality.<sup>1</sup> Immunity and inflammation  
46 play a key role in the pathogenesis of ischemic heart failure, and the complex role of immune  
47 cells during the wound healing process after injury is currently the focus of intensive research  
48 efforts. Understanding the immune mechanisms operating during AMI could pave the way to  
49 develop more effective strategies to prevent progressive dilative cardiac remodeling,  
50 functional deterioration and heart failure and to reduce cardiovascular adverse events.

51 HLA-DR<sup>neg/low</sup> monocytes and immature neutrophils expand in pathological conditions such  
52 as cancer, infection and inflammation,<sup>2</sup> and have recently been implicated in the pathogenesis  
53 of severe COVID-19,<sup>3-4</sup> but their role in immune mechanisms operating during AMI remains  
54 largely unknown.

55 By integrating flow cytometric immunophenotyping of monocyte, neutrophil and lymphocyte  
56 subsets, *ex vivo* experiments with sorted cells as well as bioinformatic tools this study  
57 investigated the appearance and the functional immune properties of immature neutrophils  
58 and HLA-DR<sup>neg/low</sup> monocytes in patients with AMI. We also explored whether increased  
59 frequencies of immature neutrophils and HLA-DR<sup>neg/low</sup> monocytes are linked to circulating  
60 levels of immune regulators and acute inflammation markers such as G-CSF,  
61 S100A9/S100A8, MMP-9, NGAL, MPO, IL-6, TNF- $\alpha$ , IL-1 $\beta$  and IFN- $\gamma$ . Using a mouse  
62 model of reperfused AMI we addressed whether immature neutrophils migrate into the  
63 ischemic myocardium.

## 64 **Methods**

### 65 **Patients and study design**

66 The study protocol is in accordance with the ethical guidelines of the 1975 declaration of  
67 Helsinki and has been approved by the local ethics committee of Hannover Medical School.  
68 Patients referred to our department for acute coronary syndrome (ACS) were included after  
69 providing written informed consent. Patients suffering from active malignant diseases or  
70 receiving immunosuppressive therapy were not included. Seventy-one patients (Table 1) were  
71 categorized into unstable angina (UA, n=11), Non-ST-elevation MI (NSTEMI, n=16), and  
72 ST-elevation MI (STEMI, n=44). Left ventricular (LV) ejection fraction was measured in 2D  
73 echocardiographic studies using bi-plane Simpson's method. Seventeen healthy volunteers  
74 were recruited as control subjects.

**Table 1.** General Traits

|                               |                          | <b>UA (n=11)</b>  | <b>NSTEMI (n=16)</b> | <b>STEMI (n=44)</b>  |
|-------------------------------|--------------------------|-------------------|----------------------|----------------------|
| <b>Age (years)</b>            |                          | 63.3±2.5          | 64.9±3.4             | 60.6±1.7             |
| <b>Gender</b>                 | Male/Female              | 9/2               | 14/2                 | 36/8                 |
| <b>BMI (kg/m<sup>2</sup>)</b> |                          | 27.5±0.9          | 28.2±0.9             | 27.5±0.7             |
| <b>Blood analyses</b>         | LDL (mg/dL)              | 92.2±19.2         | 95.5±9.5             | 138.2±7.3            |
|                               | CK (IU/L)                | 120.0(87.0-444.0) | 189.0(126.8-377.0)   | 373.5(110.5-931.2)   |
|                               | CK <sub>max</sub> (IU/L) | 120.0(86.5-440.0) | 403.5(150.5-578.2)   | 1343.5(574.8-1917.0) |
|                               | CK-MB (IU/L)             | 19.0(17.0-22.0)   | 32.0(23.5-57.0)      | 47.0(24.5-91.5)      |
|                               | Troponin (ng/L)          | 12.8(5.3-22.7)    | 99.0(36.7-273.5)     | 337.0(84.0-962.0)    |
|                               | Creatinine (μmol/L)      | 83.0±4.5          | 88.6±4.8             | 98.5±8.3             |
|                               | CRP (mg/L)               | 1.6(0.7-3.4)      | 1.8(1.1-4.3)         | 2.5(1.2-4.7)         |

75 Data are presented as mean±SEM or as median (IQR). LDL, low density lipoprotein; CK, creatine kinase; CK<sub>max</sub>, maximum CK; CK-MB,  
76 creatine kinase-myocardial band; CRP, C-reactive protein.

77

### 78 **Flow cytometry**

79 Venous blood was collected in EDTA tubes, stored at room temperature and processed within  
80 1 hour of collection. White blood cell count was measured by an automated hematology  
81 analyzer (XT 2000i, Sysmex). Serum was separated within 45 minutes and stored at -80°C.  
82 For multiparameter flow cytometry whole blood (100μL) was incubated with fluorochrome-  
83 conjugated antibodies for 30 minutes at room temperature in the dark, followed by lysis of red  
84 blood cells with Versalyse Lysing Solution® (Beckman Coulter).<sup>5</sup> Finally, the cells were  
85 washed twice with Hanks buffer (4mL). For cell sorting by flow cytometry cells were  
86 resuspended in ice-cold FACS-staining buffer (PBS, supplemented with 0.5% bovine serum  
87 albumin and 2mM EDTA) and immunostaining was performed on ice. The following  
88 antibodies were used: anti-CD14 (Clone M5E2, 1:50 BD Biosciences); anti HLA-DR (Clone

89 L243, 1:30 BioLegend); anti-CD16 (Clone 3G8, 1:50 BioLegend); anti-CX3CR1 (Clone 2A9-  
90 1, 1:50 BioLegend); anti-CCR2 (Clone K036C2, 1:50 BioLegend); anti-CD66 (Clone G10F5,  
91 1:30 BioLegend); anti-CD10 (Clone HI10a, 1:20 BioLegend); anti-CD3 (Clone SK7, 1:30 BD  
92 Biosciences); anti-CD4 (Clone RPA-T4, 1:30 BD Biosciences); anti-CD28 (Clone CD28.2,  
93 1:30 BioLegend); anti-CCR7 (Clone G043H7, 1:30 BioLegend); anti-CD45RO (Clone  
94 UCHL1, 1:30 BioLegend). Fluorescence minus one (FMO) controls were included during  
95 acquisition for gating analyses to distinguish positive from negative staining cell populations.  
96 FACS data were acquired on a Gallios™ flow cytometer and analyzed with Gallios™  
97 software (Beckman Coulter).

### 98 **Isolation of blood mononuclear cells and neutrophils**

99 Peripheral blood was collected in EDTA tubes and mononuclear cells (PBMC) were isolated  
100 by density gradient centrifugation using Ficoll®-Paque Premium (GE Healthcare  
101 Biosciences). CD14<sup>+</sup>HLA-DR<sup>neg/low</sup>/CD14<sup>+</sup>HLA-DR<sup>high</sup> monocytes cells were FACS-sorted  
102 from PBMC. Granulocytes/neutrophils were isolated from the erythrocyte fraction by dextran  
103 sedimentation or from whole blood by immunomagnetic selection (130-104-434,  
104 MACSxpress® Whole Blood Neutrophil Isolation Kit; Miltenyi Biotec), and  
105 CD10<sup>neg</sup>/CD10<sup>pos</sup> neutrophils were separated by flow-cytometric sorting. Cells were sorted in  
106 RTL Lysis Buffer plus 1% β-mercaptoethanol (74134, RNeasy Plus Mini Kit; QIAGEN), or  
107 in sterile Sorting Medium [RPMI 1640 supplemented with 10% (v/v) Heat-Inactivated Fetal  
108 Bovine Serum (HI-FCS; A3840001; Gibco)]. Cell sorting was performed using a FACS Aria  
109 Fusion or FACS Aria IIu (BD Biosciences).

### 110 **Macrophage generation and stimulation**

111 For in vitro differentiation of monocytes into macrophages, FACS-sorted cells were  
112 suspended at  $0.5 \times 10^6$  cells/mL in RPMI 1640 medium supplemented with 10% HI-FCS and  
113 1% PenStrep (10378016; Gibco). CD14<sup>+</sup>HLA-DR<sup>neg/low</sup>/CD14<sup>+</sup>HLA-DR<sup>high</sup> monocytes were  
114 cultured in 96 well plates (200μL/well) in the presence of 20 ng/mL M-CSF (216-MC-005;  
115 R&D Systems) for 4 days.<sup>6</sup> Monocyte-derived macrophages [(Mb), in RPMI 1640 medium  
116 supplemented with 2% HI-FCS] were stimulated with 20 ng/mL of IFNγ [M(IFNγ), 285-IF;  
117 R&D Systems] for 48 hours.

### 118 **T-cell proliferation assays in presence of monocytes**

119 Isolation of CD3<sup>+</sup> T-cells was performed using Dynabeads® Untouched™ Human T-cells Kit  
120 (11344D, Invitrogen). CD3<sup>+</sup> T-cells were stained with CellTrace Violet Cell Proliferation Kit  
121 (C34571; Invitrogen) and resuspended at  $1 \times 10^6$ /mL in T-Cell Activation Medium  
122 (OpTmizer™ CTS™ T-Cell Expansion culture medium supplemented with L-

123 glutamine/PenStrep; A1048501; Gibco). CD3<sup>+</sup> T-cells were co-cultured in 96 well plates with  
124 CD14<sup>+</sup>HLA-DR<sup>neg/low</sup> and CD14<sup>+</sup>HLA-DR<sup>high</sup> monocytes at a ratio of 1 to 1 (T-cells:  
125 monocytes). T-cells were stimulated with Dynabeads Human T-Activator CD3/CD28  
126 (11131D; Gibco) and T-cell proliferation was assessed 4 days later by CellTrace™ Violet  
127 dilution by flow cytometry.

#### 128 **T-cell activation assays in presence of CD10<sup>neg</sup>/CD10<sup>pos</sup> neutrophils**

129 CD4<sup>+</sup> T-cells were isolated from PBMC using the MojoSort™ Human CD4 T Cell Isolation  
130 Kit (480009; BioLegend) or by flow-cytometric sorting. The CD28 MicroBead Kit (130-093-  
131 247; Miltenyi Biotec) was used for isolation of CD4<sup>+</sup>CD28<sup>null</sup> T-cells from PBMC. CD4<sup>+</sup> T-  
132 cells and CD4<sup>+</sup>CD28<sup>null</sup> T-cells were resuspended at 1x10<sup>6</sup>/mL in T-Cell Activation Medium  
133 and stimulated with Dynabeads Human T-Activator CD3/CD28. For transwell experiments  
134 CD4<sup>+</sup> T-cells and CD10<sup>neg</sup>/CD10<sup>pos</sup> neutrophils were co-cultured in 24 well plates at a ratio of  
135 1 to 2 (T-cells: neutrophils) for 24 hours. CD10<sup>neg</sup>/CD10<sup>pos</sup> neutrophils were cultured in 0.4-  
136 µm transwell inserts (140620, Thermo Scientific™) and CD4<sup>+</sup> T-cells in the well beneath the  
137 insert. In some experiments, CD10<sup>neg</sup>/CD10<sup>pos</sup> neutrophils were cultured overnight in T-Cell  
138 Activation Medium. The cell-free supernatants derived from CD10<sup>neg</sup>/CD10<sup>pos</sup> neutrophils  
139 were added to CD4<sup>+</sup> T-cells cultured in 96-well plates (8x10<sup>4</sup> cells/well) in the presence of  
140 neutralizing anti-IL-12 antibody (4µg/mL; MAB219, R&D Systems) or isotype control  
141 (4µg/mL; MAB002, R&D Systems). CD4<sup>+</sup>CD28<sup>null</sup> T-cells were cultured with cell-free  
142 supernatants derived from CD10<sup>neg</sup> neutrophils. Culture supernatants were collected after 24  
143 hours incubation.

#### 144 **LEGENDplex and ELISA assays**

145 Blood levels of G-CSF, MMP9, S100A9/S100A8, NGAL, MPO, TNF-α, IL-6, IL-1β and  
146 IFN-γ were measured using bead-based multiplex assays (740180; 740589; 740929;  
147 LEGENDplex™ BioLegend). Serum samples were screened for CMV-specific IgG  
148 antibodies with the CMV-IgG-ELISA PKS Medac enzyme immunoassay (115-Q-PKS;  
149 Medac Diagnostika), using a cut-off value of >0.55 AU/mL for defining seropositivity  
150 according to manufacturer's guidelines. Levels of IFN-γ, IL-12, TNF-α, IL-6, and IL-1β in the  
151 cell-culture supernatants were measured by ELISA (DIF50; R&D Systems) and using bead-  
152 based immunoassay (740929; LEGENDplex™ BioLegend).

#### 153 **RT-quantitative PCR**

154 RNA was isolated from cells sorted in RTL Lysis Buffer using the RNeasy Plus Mini Kit  
155 (QIAGEN) according to the manufactures' protocol. RNA quantification and quality testing  
156 were assessed by NanoDrop 2000 (Thermo Fisher Scientific) and Bioanalyzer 2100 (Agilent).

157 cDNA synthesis was performed using 3 ng (neutrophils) and 10 ng (monocytes) of total RNA  
158 and iScript<sup>TM</sup> Reverse Transcription Supermix (Bio-Rad). Relative quantitation of mRNA  
159 expression levels was determined with CFX96 Touch<sup>TM</sup> Real Time PCR using  
160 SsoAdvanced<sup>TM</sup> Universal SYBR Green Supermix and PrimePCR<sup>TM</sup> Primers (Bio-Rad).  $\beta$ -  
161 actin (ACTB) was chosen as an endogenous control. PCR amplification was performed at  
162 initially 95 °C for 30 s followed by 40 cycles at 95 °C for 5 s and terminated by 60 °C for 30s.  
163 The delta-delta Ct method was employed for data analysis.

## 164 **Animal experiments**

### 165 *Study protocol*

166 All animal experiments were conducted in accordance with the Guide for the Care and Use of  
167 Laboratory Animals published by the National Institutes of Health (Publication No. 85–23,  
168 revised 1985). All procedures were approved by the Regierung von Unterfranken (Würzburg,  
169 Germany; permit No. 54–2531.01-15/07) and by the Niedersächsisches Landesamt für  
170 Verbraucherschutz und Lebensmittelsicherheit (Oldenburg, Germany; permit No. 33.12-  
171 42502-04-11/0644; 33.9-42502-04-13/1124 and 33.12-42502-04-17/2702). C57Bl/6 mice of  
172 both sexes were used in this study.<sup>7-10</sup>

### 173 *Mouse model of reperfused AMI*

174 Myocardial ischemia was induced by transient left coronary artery ligation in age- and  
175 gender-matched mice. Briefly, mice were anesthetized with 2% isoflurane in a 100% oxygen  
176 mix, intubated, and ventilated using a ventilator (MINIVENT mouse ventilator model 845)  
177 with the tidal volume adjusted based on body weight (10 $\mu$ L/g BW). Buprenorphine (0.1  
178 mg/kg BW) was intraperitoneally administered for postoperative pain relief. The left coronary  
179 artery was ligated with a 6-0 silk suture just below the left auricular level.<sup>7-10</sup> The suture was  
180 passed through a segment of PE-10 tubing. One hour after ischemia the tube was removed to  
181 allow for reperfusion. In sham-operated control mice the ligature around the left anterior  
182 descending coronary artery was not tied.

### 183 *Isolation of immune cells and fluorescence-activated cell sorting*

184 Mice were anesthetized, intubated and ventilated. Blood samples were drawn from the  
185 inferior vena cava into EDTA-containing tubes. Neutrophil count was measured by an  
186 automated hematology analyzer (XT 2000i, Sysmex). After lysis of red blood cells with RBC  
187 Lysis Buffer (420301; BioLegend), cells were resuspended in ice-cold FACS-staining buffer.  
188 The hearts were perfused for 6 minutes with the Perfusion Buffer (113mM NaCl, 4.7mM KCl,  
189 0.6mM KH<sub>2</sub>PO<sub>4</sub>, 0.6mM Na<sub>2</sub>HPO<sub>4</sub>, 1.2mM MgSO<sub>4</sub>, 12mM NaHCO<sub>3</sub>, 10mM KHCO<sub>3</sub>,  
190 10mM HEPES, 30mM Taurine, 5.5mM glucose, 10mM 2,3-Butanedione monoxime), and



191 subsequently digested for 8 minutes with the Digestion Buffer (0.2mg/mL Liberase™ Roche  
192 Diagnostics; and 400µM calcium chloride in perfusion buffer), using a modified Langendorff  
193 perfusion system. The ischemic-reperfused area and surviving myocardium were separated  
194 using a dissecting microscope. Subsequently, the heart tissue was smoothly pipetted through a  
195 sterile low waste syringe several times in order to obtain a cell suspension in Stop Buffer  
196 (perfusion buffer supplemented with 10% (v/v) HI-FCS). The cell suspension was carefully  
197 filtered through a 70µm cell strainer in a 50 mL conical tube, and the cell strainer was washed  
198 with perfusion buffer. Then, the cell suspension was centrifuged at 400g for 20 minutes. The  
199 pelleted cells were washed and resuspended in ice-cold FACS-staining buffer.<sup>7-9</sup> To prevent  
200 capping of antibodies on the cell surface and non-specific cell labeling all steps were  
201 performed on ice and protected from light. Cells were preincubated with Fc Block (Mouse BD  
202 Fc Block™; BD Biosciences) for 10 minutes. Subsequently, fluorochrome-conjugated  
203 antibodies were added and incubated for 30 minutes. Finally, the cells were washed twice  
204 with ice-cold FACS-staining buffer. After pre-selection in side scatter (SSC) vs. forward  
205 scatter (FSC) dot plot to exclude debris and FSC vs. Time-of-Flight (ToF) dot plot to  
206 discriminate doublets by gating single cells, blood monocytes were identified as  
207 CD45<sup>+</sup>/CD11b<sup>+</sup>/Ly6G<sup>-</sup>/CD115<sup>+</sup> cells, blood neutrophils as CD45<sup>+</sup>/CD11b<sup>+</sup>/Ly6G<sup>+</sup> cells,  
208 infarct macrophages as CD45<sup>+</sup>/CD11b<sup>+</sup>/Ly6G<sup>-</sup>/F4/80<sup>+</sup> cells and infarct neutrophils as  
209 CD45<sup>+</sup>/CD11b<sup>+</sup>/F4/80<sup>-</sup>/Ly6G<sup>+</sup> cells.<sup>7-9</sup> The following antibodies were used: anti-CD45 (clone  
210 104, 1:100, BioLegend/BD Biosciences); anti-F4/80 (clone BM8, 1:100, BioLegend; clone  
211 T45-2342, 1:100, BD Biosciences); anti-CD11b (clone M1/70, 1:100 eBioscience/BD  
212 Biosciences); anti-CD115 (clone AFS98, 1:100 BioLegend); anti-Ly6G (clone 1A8, 1:100  
213 BioLegend; 1:200 BD Biosciences); anti-CD182 (clone SA044G4/clone SA045E1, 1:100  
214 BioLegend); anti-CD101 (clone Moushi101, 1:100 eBioscience; clone 307707, 1:100 BD  
215 Biosciences). For MMP-9 and IL-1β intracellular staining, the Cytofix/Cytoperm™  
216 Fixation/Permeabilization Kit was used according to the manufacturer's protocol (BD  
217 Biosciences). Antibodies included anti-MMP-9 (AF909; 1:100 R&D Systems); anti IL-1β  
218 (ab9722; 1:100 Abcam); donkey anti-goat secondary antibody (A-11055; Invitrogen) and  
219 goat anti-rabbit secondary antibody (A-11034; Invitrogen). FMO controls were included  
220 during acquisition for gating analyses to distinguish positive from negative staining cell  
221 populations. FACS data were acquired on a Gallios™ flow cytometer and analyzed with  
222 Gallios™ software (Beckman Coulter). Cell sorting was performed using a FACS Aria Fusion  
223 (BD Biosciences). Cells were sorted in Lysis-Buffer (PreEase RNA Spin Kit, Affymetrix;  
224 PN78766, USB),<sup>7-8</sup> or in sterile Sorting Medium.



## 225 ***RNA-Seq***

226 Total RNA was isolated using PrepEase RNA Spin Kit (Affymetrix; PN78766, USB)  
227 according to the manufacturer's instructions.<sup>7-8</sup> Sorted cells were directly collected in lysis  
228 buffer and immediately processed. RNA quantification and quality testing were assessed by  
229 NanoDrop 2000 (Thermo Fisher Scientific) and Bioanalyzer 2100 (Agilent). Libraries for  
230 RNA sequencing were prepared from 30 ng total RNA; from each sample, polyA RNA was  
231 purified, converted to cDNA and linked to Illumina adapters using the Illumina TruSeq  
232 stranded mRNA Kit according to the manufacturer's instructions. Samples were multiplexed  
233 and sequenced on an Illumina NextSeq 500 in a 75 nt single end setting using a high-output  
234 run mode. Raw BCL files were demultiplexed and converted to sample-specific FASTQ files  
235 using bcl2fastq v1.8.4 (Illumina). Residual adapter sequences present in the sequencing reads  
236 were removed with Cutadapt version 1.12. Reads (~ 40 million per sample) were aligned to  
237 the mouse reference sequence GENCODE vM8 using STAR version 2.5.2b. RNA sequencing  
238 data analysis was undertaken with the statistical programming language, R. The R package  
239 DeSeq2 (v1.14.1) was used to evaluate differential gene expression.<sup>7-8</sup>

## 240 **Statistical Analysis**

241 Data are presented as mean  $\pm$  SEM or as median [interquartile range] as indicated. Normality  
242 of data was assessed by Shapiro-Wilk test. Normal data were analyzed by one-way ANOVA  
243 with Tukey *post hoc* test. Mann-Whitney *U* test was used to compare two independent groups.  
244 Kruskal-Wallis test was used for comparisons of median values among three or more groups,  
245 followed by un-paired Mann-Whitney *U* test for multiple comparisons. Linear regression  
246 analysis or Spearman's rank correlation test was used to determine relationship between  
247 variables. Values of  $P \leq 0.05$  were considered statistically significant.

## 248 RESULTS

### 249 Increased circulating levels of CD14<sup>+</sup>HLA-DR<sup>neg/low</sup> monocytes in patients with acute MI

250 Flow cytometric immunophenotyping was performed in whole blood from patients with  
 251 unstable angina (UA) or acute MI within 24 to 72 hours of symptom onset (median 43.6  
 252 hours). A time-course analysis of monocyte subset-frequencies up to day 5 after MI is shown  
 253 in Figure 1-figure supplement 1.

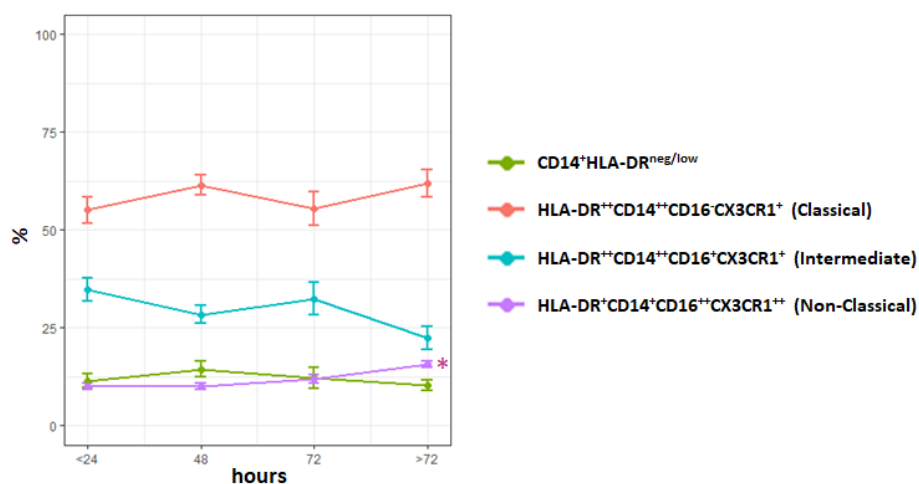

254  
 255 **Figure 1-figure supplement 1.** Time course analysis of monocyte subset-frequencies. Phenotypic  
 256 characterization was performed within the initial 24 hours and up to day 5 after onset of symptoms in patients  
 257 with ACS. \* $P < 0.01$  vs.  $\leq 24$  hours. Error bars represent SEM.  
 258

259  
 260 NSTEMI/STEMI patients displayed significantly higher absolute neutrophil and monocyte  
 261 counts versus UA patients (Table 2). Based on HLA-DR/CD14/CD16 expression monocytes  
 262 can be divided into different subsets. We detected increased circulating levels of intermediate  
 263 (HLA-DR<sup>++</sup>CD14<sup>++</sup>CD16<sup>+</sup>CX3CR1<sup>+</sup>) in ACS patients versus control, and of non-classical  
 264 (HLA-DR<sup>+</sup>CD14<sup>+</sup>CD16<sup>+</sup>CX3CR1<sup>++</sup>) in STEMI versus UA patients and controls (Table 2  
 265 Figure 1-figure supplement 2). There were no significant correlations between  
 266 intermediate/non-classical monocytes and LV ejection fraction/ $CK_{max}$ .

267

**Table 2.** Leukocyte Count and Monocyte Subsets

|                                            | CTR (n = 17)     | UA (n=11)         | NSTEMI (n=16)      | STEMI (n=44)       | P (K-W) |
|--------------------------------------------|------------------|-------------------|--------------------|--------------------|---------|
| Neutrophil ( $10^3/\mu\text{L}$ )          | 3.25 (2.74-3.42) | 4.05 (3.65-4.56)* | 5.72 (4.80-7.79)*† | 6.13 (5.18-7.04)*† | <0.0001 |
| Monocyte ( $10^3/\mu\text{L}$ )            | 0.65 (0.53-0.74) | 0.74 (0.49-0.80)  | 0.88 (0.72-1.03)*† | 0.99 (0.77-1.25)*† | <0.001  |
| Lymphocyte ( $10^3/\mu\text{L}$ )          | 2.20 (1.96-2.47) | 1.82 (1.55-1.98)  | 1.97 (1.76-2.49)   | 2.07 (1.58-2.64)   | 0.30    |
| Lymphocyte/Neutrophil ratio                | 0.70 (0.57-0.79) | 0.45 (0.38-0.56)* | 0.32 (0.28-0.44)*  | 0.35 (0.27-0.45)*  | <0.0001 |
| Eosinophil ( $10^3/\mu\text{L}$ )          | 0.16 (0.10-0.30) | 0.15 (0.12-0.16)  | 0.20(0.14-0.34)    | 0.12 (0.06-0.20)   | 0.08    |
| Monocyte Classical (n/ $\mu\text{L}$ )     | 476 (334-583)    | 332 (244-388)     | 510 (454-719)†     | 505 (388-666)†     | <0.05   |
| Monocyte Intermediate (n/ $\mu\text{L}$ )  | 130 (73-145)     | 186 (131-367)*    | 204 (144-310)*     | 249 (167-442)*     | <0.001  |
| Monocyte Non Classical (n/ $\mu\text{L}$ ) | 48 (30-64)       | 50 (37-67)        | 64 (47-108)        | 102 (60-138)*†     | <0.001  |

268 Data are presented as median (IQR). Kruskal-Wallis (K-W) test; \* $P < 0.05$  vs. Control (CTR); † $P < 0.05$  vs. UA.

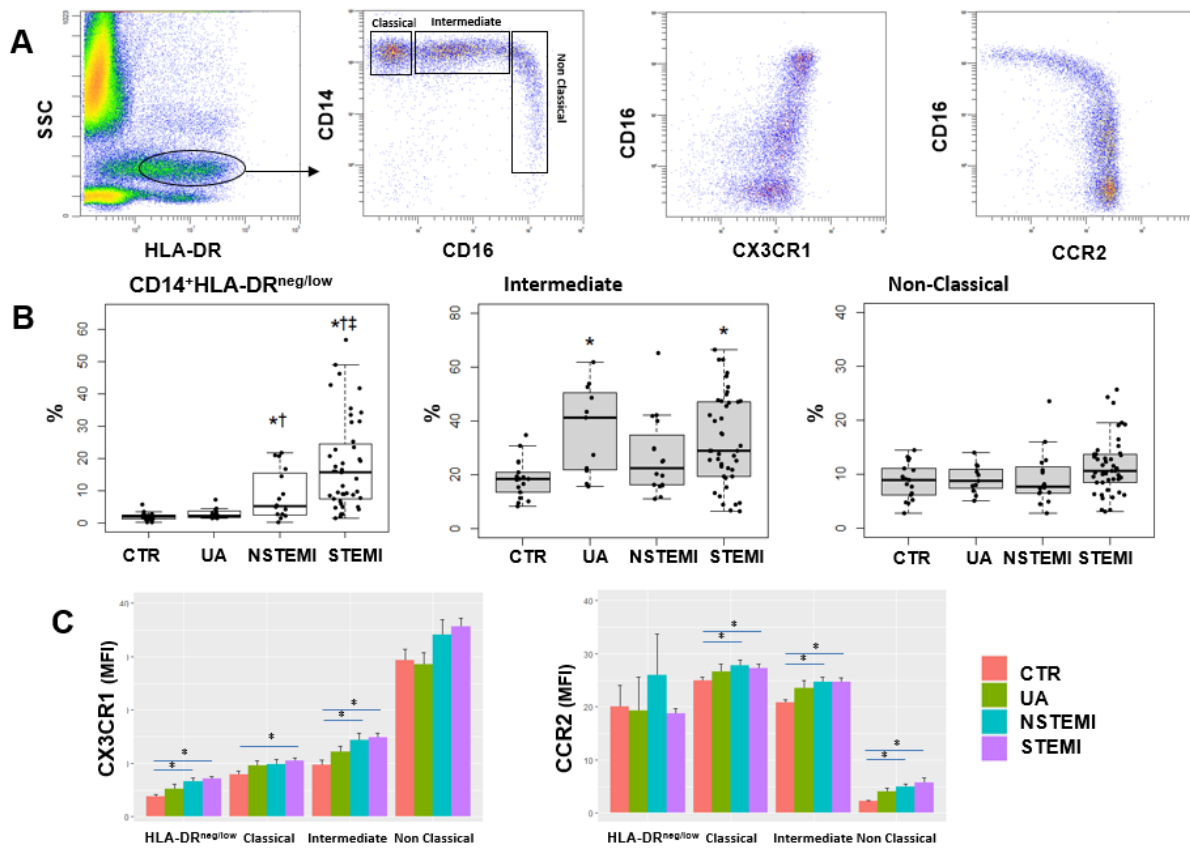

269

270 **Figure 1-figure supplement 2. A** Gating strategy to identify classical (HLA-DR<sup>++</sup>CD14<sup>++</sup>CD16<sup>-</sup>CX3CR1<sup>+</sup>),  
 271 intermediate (HLA-DR<sup>++</sup>CD14<sup>++</sup>CD16<sup>+</sup>CX3CR1<sup>+</sup>) and non-classical (HLA-DR<sup>+</sup>CD14<sup>+</sup>CD16<sup>++</sup>CX3CR1<sup>++</sup>)  
 272 monocytes. **B** Percentages of CD14<sup>+</sup>HLA-DR<sup>neg/low</sup>, intermediate and non-classical monocytes in control  
 273 subjects (CTR, n=17) and in patients with unstable angina (UA; n=11), non-ST-elevation MI (NSTEMI, n=16),  
 274 and ST-elevation MI (STEMI, n=44). **C** Mean fluorescence intensity (MFI) of CX3CR1 and CCR2 on monocyte  
 275 subsets. \**P*<0.05 vs. CTR; †*P*<0.05 vs. UA; ‡*P*<0.05 vs. NSTEMI.  
 276

277 We found increased percentages and absolute numbers of circulating CD14<sup>+</sup>HLA-DR<sup>neg/low</sup>  
 278 monocytes in STEMI/NSTEMI patients as compared to UA patients (Figure 1A, 1B and  
 279 Figure 1-figure supplement 2B). Linear regression analysis revealed a positive correlation  
 280 between circulating levels of CD14<sup>+</sup>HLA-DR<sup>neg/low</sup> monocytes and CK<sub>max</sub> (Figure 1C) and a  
 281 negative correlation with LV ejection fraction (R=0.44, *P*<0.001).

282 Receiver operating characteristic (ROC) curve analysis based on circulating CD14<sup>+</sup>HLA-  
 283 DR<sup>neg/low</sup> monocytes (n/μL), discriminating UA and STEMI patients revealed an AUC of  
 284 0.949 (95% CI: 0.892-1; *P*<0.001) whereas a lower AUC discriminating UA and NSTEMI  
 285 patients was observed (AUC=0.786; 95% CI: 0.612-0.961; *P*<0.01). By combining  
 286 CD14<sup>+</sup>HLA-DR<sup>neg/low</sup> monocytes with CK<sub>max</sub> AUC was increased to 0.970; (95% CI: 0.931-1)  
 287 (Figure 1D) but not in combination with LVEF (AUC=0.925; 95% CI: 0.840-1) compared to  
 288 CD14<sup>+</sup>HLA-DR<sup>neg/low</sup> monocytes alone discriminating UA and STEMI patients.

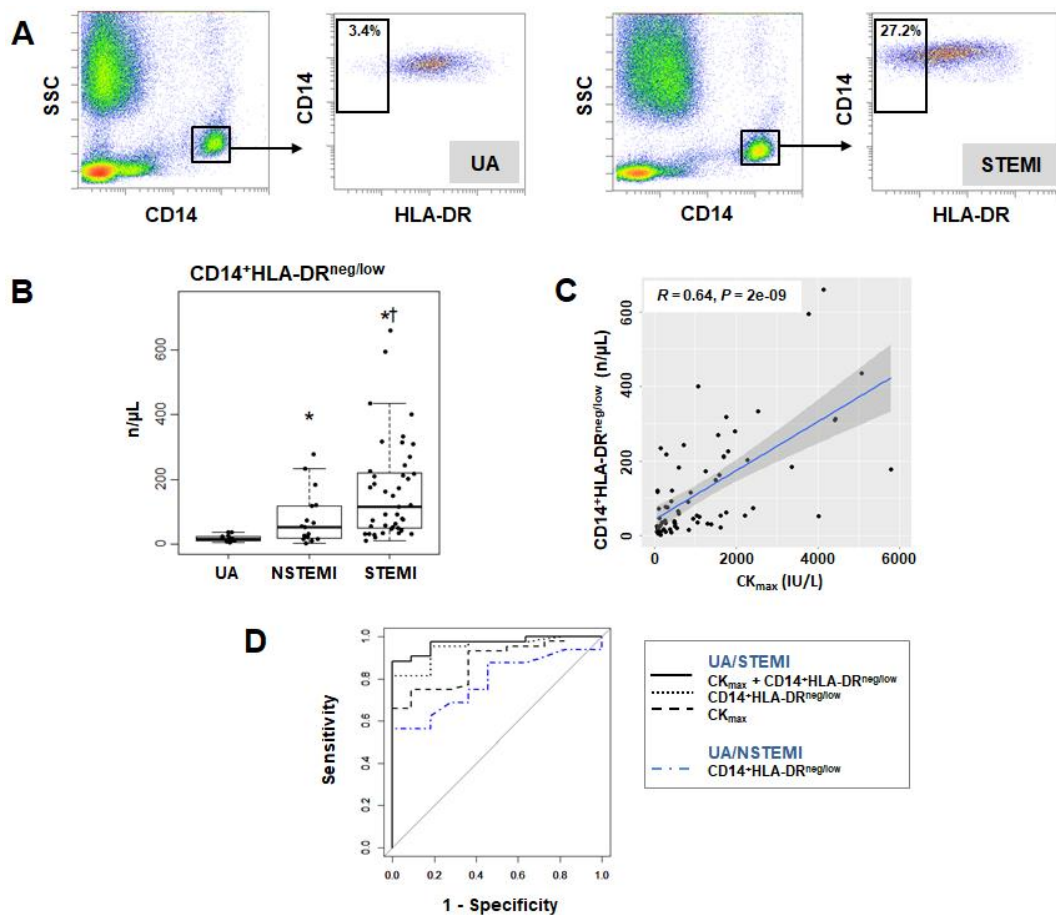

289

Figure 1

290 **Figure 1. Increased circulating levels of CD14<sup>+</sup>HLA-DR<sup>neg/low</sup> monocytes in patients with AMI.** A Gating  
 291 strategy to identify CD14<sup>+</sup>HLA-DR<sup>neg/low</sup> monocytes. B Circulating levels of CD14<sup>+</sup>HLA-DR<sup>neg/low</sup> monocytes in  
 292 patients with unstable angina (UA; n=11), non-ST-elevation MI (NSTEMI, n=16), and ST-elevation MI  
 293 (STEMI, n=44). C Linear regression analysis between circulating levels of CD14<sup>+</sup>HLA-DR<sup>neg/low</sup> monocytes and  
 294 maximum CK (CK<sub>max</sub>) in patients with acute coronary syndrome. D Receiver operator characteristic (ROC)  
 295 curve of CD14<sup>+</sup>HLA-DR<sup>neg/low</sup> monocytes discriminating UA/STEMI and NSTEMI patients and the combination  
 296 of CD14<sup>+</sup>HLA-DR<sup>neg/low</sup> monocytes (n/μL) with CK<sub>max</sub>. \*P < 0.05, vs. UA; †P < 0.05, vs. NSTEMI.  
 297

298 Next, we analyzed the immunoregulatory features of CD14<sup>+</sup>HLA-DR<sup>neg/low</sup> monocytes.  
 299 Using FACS-sorting, CD14<sup>+</sup>HLA-DR<sup>neg/low</sup>/CD14<sup>+</sup>HLA-DR<sup>high</sup> cells were isolated from blood  
 300 of patients with AMI (Figure 2A). Quantitative RT-PCR showed that HLA-DR<sup>neg/low</sup>  
 301 monocytes express high amounts of S100A9 and IL1R1 (Figure 2B). Of interest, studies in  
 302 heart failure patients have provided evidence for the presence of HLA-DR<sup>neg/low</sup> cells within  
 303 myocardial tissue expressing high levels of S100A9.<sup>11</sup>

304 CD14<sup>+</sup>HLA-DR<sup>neg/low</sup> monocytes did not suppress T-cell proliferation (Figure 2C),  
 305 indicating that the expanded population of monocytic cells in infarct patients are not  
 306 immunosuppressive. Remarkably, macrophages differentiated from CD14<sup>+</sup>HLA-DR<sup>neg/low</sup>  
 307 monocytes by 4-day culture with M-CSF produced more TNF-α, IL-6, and IL-1β upon  
 308 stimulation with IFN-γ, as compared to macrophages generated from monocytes CD14<sup>+</sup>HLA-

309 DR<sup>high</sup> (Figure 2D through 2F). These results indicate a crucial role for CD14<sup>+</sup>HLA-DR<sup>neg/low</sup>  
 310 monocytes in the inflammatory response during AMI.  
 311

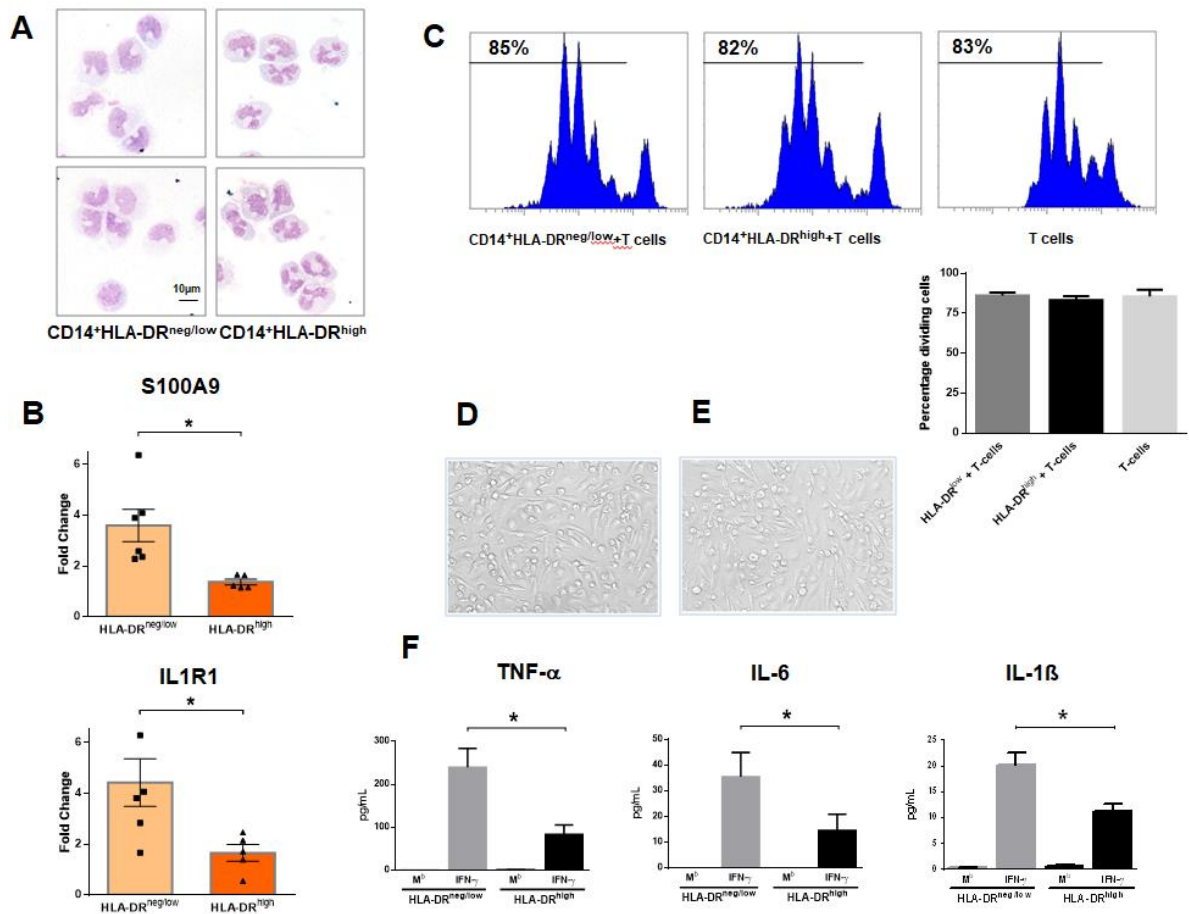

Figure 2

312  
 313 **Figure 2. CD14<sup>+</sup>HLA-DR<sup>neg/low</sup> monocytes from patients with AMI are not immunosuppressive but exhibit**  
 314 **an inflammatory phenotype.** **A** May-Grünwald Giemsa stained cytospin preparations of CD14<sup>+</sup>HLA-DR<sup>neg/low</sup>  
 315 and CD14<sup>+</sup>HLA-DR<sup>high</sup> monocytes. **B** Relative RNA expression of S100A9 and IL1R1 in CD14<sup>+</sup>HLA-DR<sup>neg/low</sup>  
 316 versus CD14<sup>+</sup>HLA-DR<sup>high</sup> monocytes. **C** T-cell proliferation in the presence of CD14<sup>+</sup>HLA-DR<sup>neg/low</sup> or  
 317 CD14<sup>+</sup>HLA-DR<sup>high</sup> monocytes assessed by CellTrace™ Violet dilution after 96 hours of co-culture. **D**  
 318 Macrophages differentiated from CD14<sup>+</sup>HLA-DR<sup>neg/low</sup> monocytes and **(E)** CD14<sup>+</sup>HLA-DR<sup>high</sup> cells by 4-day  
 319 culture with M-CSF. **F** TNF-α, IL-6, and IL-1β in supernatants of macrophage cultures upon stimulation with  
 320 IFN-γ. M<sup>b</sup>=baseline. CD14<sup>+</sup>HLA-DR<sup>neg/low</sup>/CD14<sup>+</sup>HLA-DR<sup>high</sup> cells were isolated by flow-cytometric sorting  
 321 from patients with AMI (n=5-6). Data are presented as mean±SEM from independent experiments. \*P<0.05.

322 No difference was seen in the expression of CAT, CCR1, IL1R2, LCN2, MMP8, NOS2,  
323 SAAP3 and STAT3 (Figure 2-figure supplement 1A) factors dysregulated in circulating  
324 monocytes as well as in infarct macrophages in a mouse model of reperfused AMI (Figure 2-  
325 figure supplement 1B, 1C).

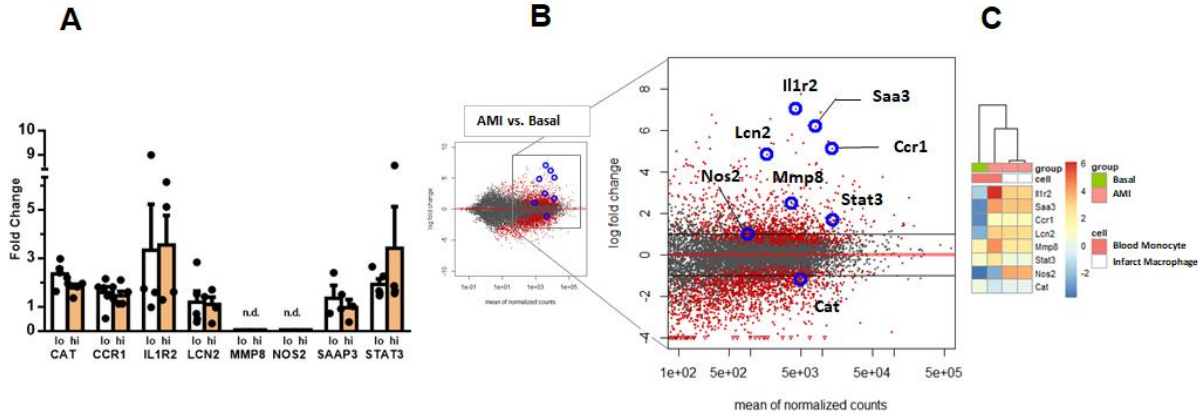

326

327 **Figure 2-figure supplement 1.** A RT-qPCR showing the expression of CAT, CCR1, IL1R2, LCN2, MMP8,  
328 NOS2, STAT3, SAAP3 in CD14<sup>+</sup>HLA-DR<sup>neg/low</sup> (lo) versus CD14<sup>+</sup>HLA-DR<sup>high</sup> (hi) monocytes FACS-sorted  
329 from blood of patients with AMI. Data are presented as mean±SEM from independent experiments. **B** MA plots  
330 showing genes regulated in circulating monocytes in a mouse model of reperfused AMI. RNA sequencing was  
331 performed on monocytes FACS-sorted from blood of sham-operated mice (Basal) and mice subjected to 1 hour  
332 of coronary occlusion followed by 6 hours of reperfusion. Genes upregulated/downregulated by AMI in  
333 monocytes were similarly regulated in (C) infarct macrophages FACS-sorted from the ischemic region 24 hours  
334 after AMI.



335 **Immature CD10<sup>neg</sup> neutrophils expand in the peripheral blood from patients with acute**  
 336 **MI**

337 Phenotypic characterization of neutrophils was performed in whole blood. The absolute  
 338 numbers and frequencies of circulating CD16<sup>+</sup>CD66b<sup>+</sup>CD10<sup>neg</sup> neutrophils were significantly  
 339 increased in STEMI versus UA patients (Figure 3A, 3B and Figure 3-figure supplement 1A).  
 340 A time-course analysis of frequencies of CD16<sup>+</sup>CD66b<sup>+</sup>CD10<sup>neg</sup> neutrophils up to day 5 after  
 341 MI is shown in Figure 3-figure supplement 1B. Circulating levels of CD16<sup>+</sup>CD66b<sup>+</sup>CD10<sup>neg</sup>  
 342 neutrophils correlated positively with CK<sub>max</sub> (Figure 3C) and negatively with LV ejection  
 343 fraction (R=0.4, p<0.001).

344 ROC curve analysis of circulating CD10<sup>neg</sup> neutrophils (n/μL), discriminating UA and STEMI  
 345 patients revealed an AUC of 0.798 (95% CI: 0.683-0.913; P<0.001) but a lower AUC  
 346 discriminating UA and NSTEMI patients (AUC=0.687; 95% CI: 0.482-0.892; P=0.015). By  
 347 combining CD10<sup>neg</sup> neutrophils with CK<sub>max</sub> or LVEF AUC was increased to 0.909; (95% CI:  
 348 0.831-0.986) and to 0.833 (95% CI: 0.691-0.974) respectively discriminating UA and STEMI  
 349 patients (Figure 3D).

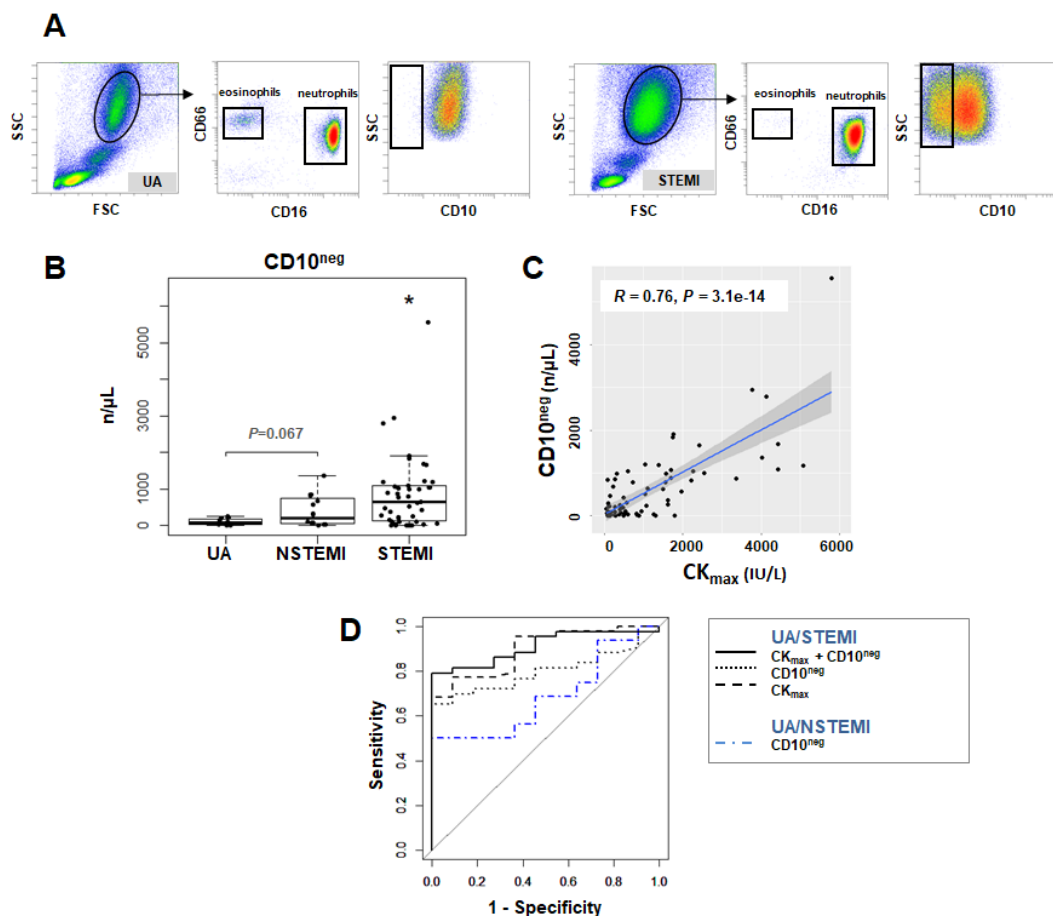

350

Figure 3

351 **Figure 3. Circulating normal-density CD10<sup>neg</sup> neutrophils increase in patients with AMI. A** Gating strategy  
 352 to identify CD10<sup>neg</sup> neutrophils. **B** Circulating levels of CD16<sup>+</sup>CD66b<sup>+</sup>CD10<sup>neg</sup> neutrophils in patients with  
 353 unstable angina (UA; n=11), non-ST-elevation MI (NSTEMI, n=16), and ST-elevation MI (STEMI, n=44). **C**



354 Linear regression analysis between circulating levels of CD10<sup>neg</sup> neutrophils and maximum CK (CK<sub>max</sub>). **D**  
355 Receiver operator characteristic (ROC) curve of CD10<sup>neg</sup> neutrophils (n/μL) discriminating UA/STEMI and  
356 NSTEMI patients and the combination of CD10<sup>neg</sup> neutrophils with CK<sub>max</sub> in patients with acute coronary  
357 syndrome. \**P*<0.05 vs. UA.  
358

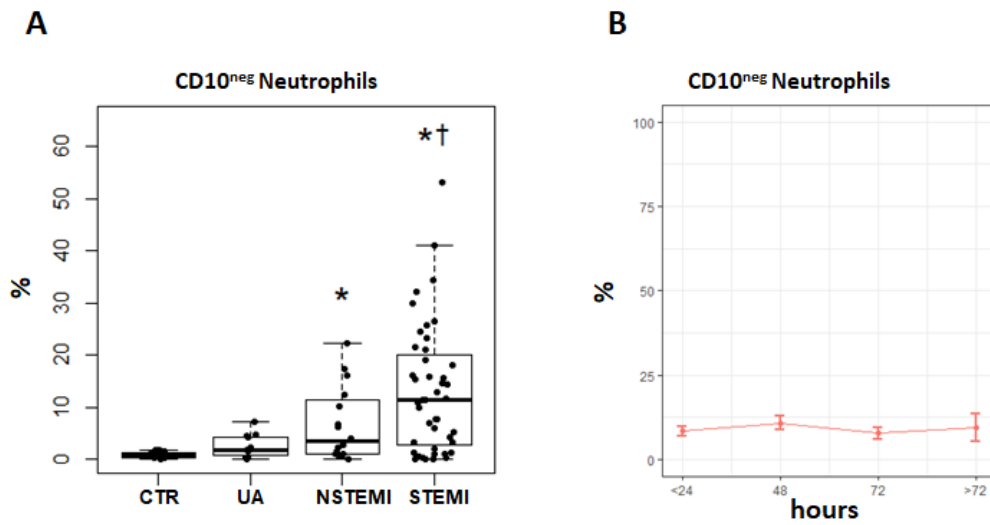

359  
360 **Figure 3- figure supplement 1.** **A** Percentages of circulating CD16<sup>+</sup>CD66b<sup>+</sup>CD10<sup>neg</sup> neutrophils in patients with  
361 unstable angina (UA; n=11), non-ST-elevation MI (NSTEMI, n=16), and ST-elevation MI (STEMI, n=44). **B**  
362 Time course analysis of frequencies of CD16<sup>+</sup>CD66b<sup>+</sup>CD10<sup>neg</sup> neutrophils. Phenotypic characterization was  
363 performed within the initial 24 hours and up to day 5 after onset of symptoms in patients with ACS. \**P*<0.05, vs.  
364 CTR; †*P*<0.05 vs. UA. Error bars represent SEM.  
365

366 CD16<sup>+</sup>CD66b<sup>+</sup>CD10<sup>neg</sup> neutrophils co-purified with the erythrocyte fraction following  
367 density gradient centrifugation. Low-density neutrophils were not present in mononuclear cell  
368 fraction obtained from AMI patients. Cytospin slides were made after FACS-sorting to  
369 examine nuclear morphology (Figure 4A). We found that the majority of the  
370 CD16<sup>+</sup>CD66b<sup>+</sup>CD10<sup>neg</sup> cells has an immature morphology with a lobular nucleus, while  
371 CD16<sup>+</sup>CD66b<sup>+</sup>CD10<sup>pos</sup> cells are mature neutrophils with segmented nuclei (Figure 4A).  
372 These findings were obtained when neutrophils were isolated by dextran sedimentation as  
373 well as by negative selection using magnetic beads, indicating that the differences between  
374 the neutrophil subpopulations cannot be considered an artifact due to the isolation technique  
375 used.<sup>12</sup> Of note, linear regression analysis revealed a strong positive correlation between the  
376 percentages of CD16<sup>+</sup>CD66b<sup>+</sup>CD10<sup>neg</sup> cells and circulating levels of G-CSF (Figure 4B). AMI  
377 patients with higher systemic concentrations of G-CSF have increased CD10<sup>neg</sup> neutrophils  
378 levels, suggesting G-CSF-driven immature neutrophil release/expansion.

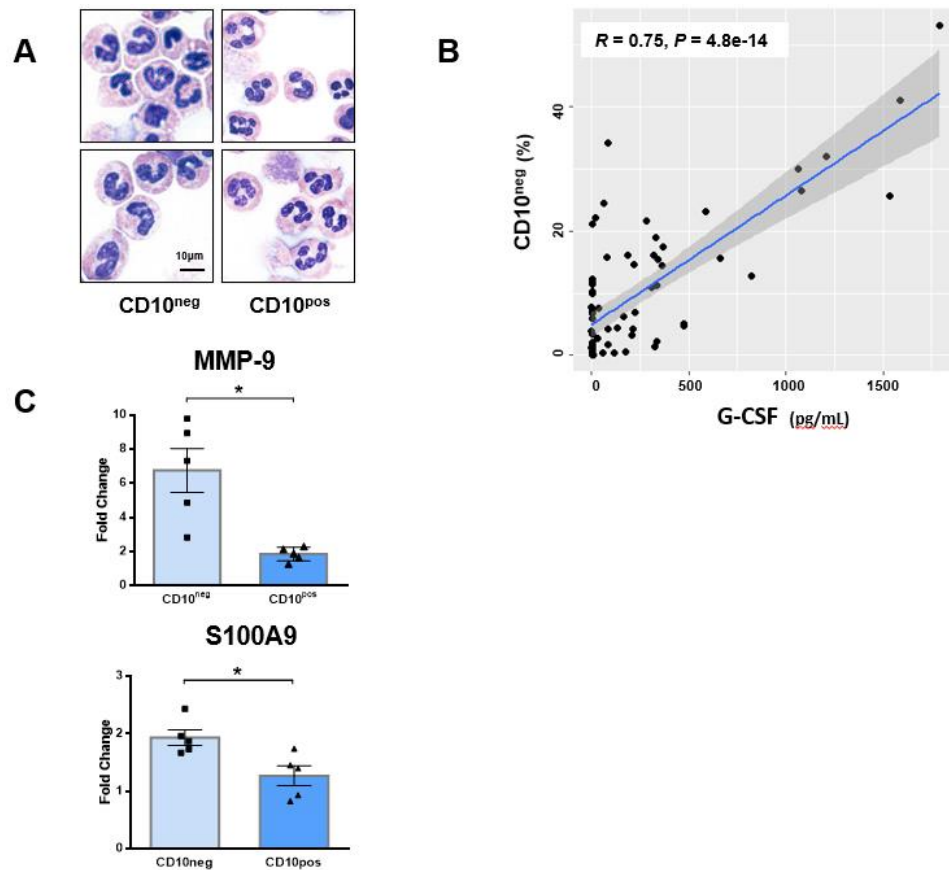

379

Figure 4

380 **Figure 4. Immature CD10<sup>neg</sup> neutrophils from patients with AMI express high amounts of MMP-9 and**  
381 **S100A9. A** May-Grünwald Giemsa stained cytopsin preparations of CD16<sup>+</sup>CD66b<sup>+</sup>CD10<sup>neg</sup> (CD10<sup>neg</sup>) and  
382 CD16<sup>+</sup>CD66b<sup>+</sup>CD10<sup>pos</sup> (CD10<sup>pos</sup>) neutrophils. **B** Linear regression analysis between the percentages of  
383 CD16<sup>+</sup>CD66b<sup>+</sup>CD10<sup>neg</sup> neutrophils and circulating levels of G-CSF in patients with acute coronary syndrome  
384 (n=71). **C** Relative RNA expression of MMP-9 and S100A9 in CD10<sup>neg</sup> versus CD10<sup>pos</sup> neutrophils.  
385 CD10<sup>neg</sup>/CD10<sup>pos</sup> neutrophils were isolated by flow-cytometric sorting from patients with AMI (n=5). Data are  
386 presented as mean±SEM from independent experiments. \*P<0.05.

387 CD10<sup>neg</sup> neutrophils sorted from blood of AMI patients express higher amounts of MMP-9  
388 and S100A9 than CD10<sup>pos</sup> neutrophils (Figure 4C). No difference was found in the expression  
389 of IGR1, ILR1, ILR2, MMP-8, NOS2, OLFM4 and STAT3 (Figure 4- figure supplement 1A),  
390 genes regulated in circulating neutrophils as well as in infarct neutrophils in a mouse model of  
391 reperused AMI (Figure 4- figure supplement 1B, 1C).  
392

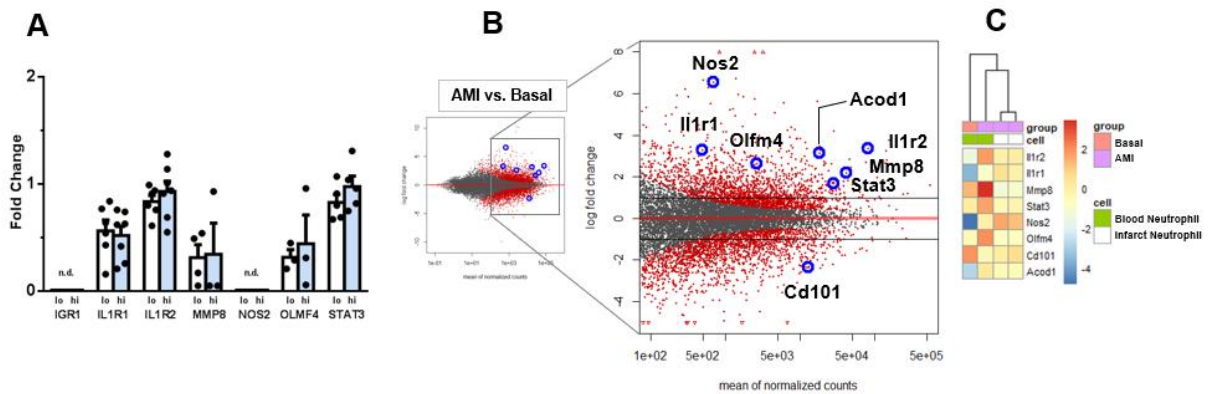

393

394 **Figure 4-figure supplement 1.** A RT-qPCR showing the expression of IGR1, ILR1, ILR2, MMP-8, NOS2,  
395 OLFM4, STAT3 in CD10<sup>neg</sup> (lo) versus CD10<sup>pos</sup> (hi) neutrophils FACS-sorted from blood of patients with AMI.  
396 Data are presented as mean±SEM from independent experiments. B MA plots showing genes regulated in  
397 circulating neutrophils in a mouse model of reperused AMI. RNA sequencing was performed on neutrophils  
398 FACS-sorted from blood of sham-operated mice (Basal) and mice subjected to 1 hour of coronary occlusion  
399 followed by 6 hours of reperfusion. Genes upregulated/downregulated by AMI in neutrophils were similarly  
400 regulated in (C) infarct neutrophils FACS-sorted from the ischemic region 24 hours after AMI.

401 **Immature neutrophils are recruited to sites of cardiac injury in a mouse model of**  
402 **reperfused acute MI**

403 We then investigated whether immature neutrophils had the capacity to migrate into the  
404 ischemic myocardium using a mouse model of reperfused AMI. Mouse neutrophils, unlike  
405 human granulocytes, lack CD10 expression.<sup>13</sup> Using next-generation RNA sequencing we  
406 identified CD101 among the genes down-regulated by ischemia in circulating neutrophils  
407 (Figure 4-figure supplement 1B). Thus, we found that CD101 can be used as a surface marker  
408 to identify the immature neutrophil subset among the heterogeneous Ly6G<sup>pos</sup>Cxcr2<sup>pos</sup>  
409 neutrophil populations, released into the bloodstream 90 minutes after reperfusion (Figure 5A,  
410 5B). As revealed by morphological analysis circulating CD11b<sup>bright</sup>CD101<sup>pos</sup> neutrophils have  
411 a mature morphology, whereas CD11b<sup>dim</sup>CD101<sup>neg</sup> cells are immature neutrophils with ring-  
412 shaped nuclei. Of interest, a recent study in mice showed that CD101 segregates immature  
413 neutrophils from mature neutrophils during G-CSF stimulation and in the tumor setting.<sup>14</sup>

414 We next analyzed whether CD101<sup>neg</sup> neutrophils are recruited to the injured myocardium.  
415 Preliminary experiments showed that current protocols for tissue dissociation and the  
416 recovery of neutrophils from ischemic myocardium involving long enzymatic digestion times  
417 resulted in cell activation/damage and non-specific phenotypic changes. Therefore, using a  
418 modified Langendorff perfusion system, the infarcted hearts were perfused for 6 minutes to  
419 remove blood cells and subsequently digested for only 8 minutes to preserve cell surface  
420 antigens along with expression profiles. Flow cytometry analysis of immune cells isolated  
421 from the ischemic region 3 hours after reperfusion revealed marked infiltration of CD101<sup>neg</sup>  
422 neutrophils ( $1.26 \pm 0.19 \cdot 10^5$ , cells/infarct; n=4), displaying increased expression of the matrix-  
423 degrading protease MMP-9 (Figure 5C). Moreover, as shown in Figure 5D, we found that 24  
424 hours after reperfusion CD101<sup>neg</sup> neutrophils expressed IL-1 $\beta$  at higher levels compared to  
425 CD101<sup>pos</sup> cells. These findings suggest migration and homing of immature CD101<sup>neg</sup>  
426 neutrophils to ischemic myocardium shortly after reperfusion.

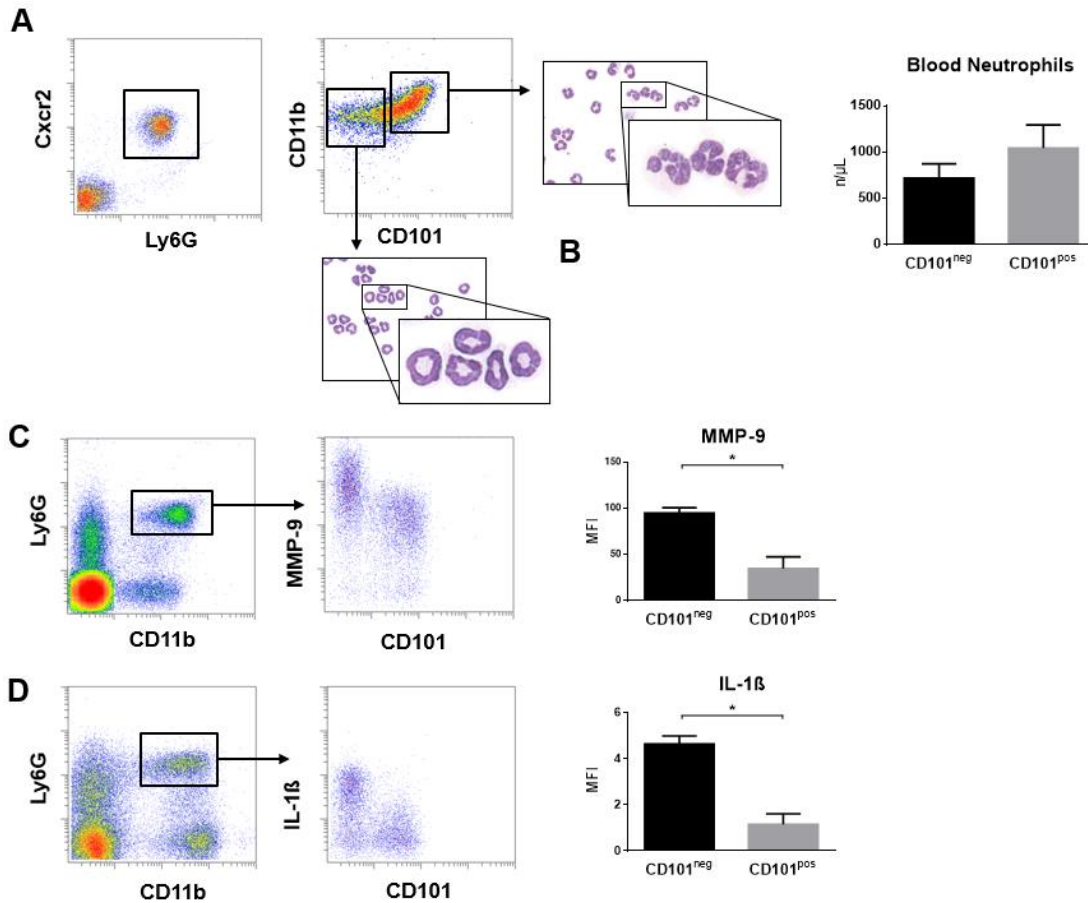

Figure 5

427

428 **Figure 5. Immature CD101<sup>neg</sup> neutrophils are rapidly recruited to ischemic sites and are a major source of**  
429 **MMP-9 and IL-1β in the reperfused myocardium in a mouse model of AMI. A** Representative gating  
430 strategy to identify circulating immature neutrophils among CD11b<sup>pos</sup>Ly6G<sup>pos</sup>CXCR2<sup>pos</sup> cells and number of  
431 CD11b<sup>dim</sup>CD101<sup>neg</sup> and CD11b<sup>bright</sup>CD101<sup>pos</sup> neutrophils released into the bloodstream 90 minutes after  
432 ischemia/reperfusion. **B** May-Grünwald Giemsa stained cytopsin preparations of sorted CD11b<sup>dim</sup>CD101<sup>neg</sup> and  
433 CD11b<sup>bright</sup>CD101<sup>pos</sup> neutrophils. **C** Flow cytometric gating strategy to identify neutrophils in the ischemic  
434 region 3 hours after reperfusion and mean fluorescent intensity (MFI) of MMP-9 on CD101<sup>neg</sup> and CD101<sup>pos</sup>  
435 neutrophils. **D** Flow cytometry identifying infarct neutrophils 24 hours after reperfusion and mean fluorescent  
436 intensity of IL-1β on CD101<sup>neg</sup> and CD101<sup>pos</sup> neutrophils. Data are presented as mean±SEM from independent  
437 experiments (n=3-4). \*P<0.05.

438 **CD10<sup>neg</sup> neutrophils and HLA-DR<sup>neg/low</sup> monocytes are linked to levels of immune-**  
 439 **inflammation markers**

440 In a subgroup of patients we measured serum levels of immune inflammation markers (Table  
 441 3). MMP-9, S100A9/S100A8, NGAL, IL-6, and IL-1 $\beta$  levels were higher in STEMI patients  
 442 versus UA patients.

**Table 3.** Immune Inflammation Markers

|                       | UA (n=11)       | NSTEMI (n=10)       | STEMI (n=26)       | P (K-W) |
|-----------------------|-----------------|---------------------|--------------------|---------|
| MMP-9 (ng/mL)         | 429(320-461)    | 447(324-597)        | 544(466-758)*      | <0.01   |
| S100A8/A9 (ng/mL)     | 7332(4638-9461) | 13802(9152-21066)*† | 17352(8592-27830)* | <0.05   |
| NGAL (ng/mL)          | 264(198-318)    | 328(211-473)        | 417(312-653)*      | <0.05   |
| MPO (ng/mL)           | 221(153-337)    | 323(158-443)        | 389(230-487)*      | 0.05    |
| IL-6 (pg/mL)          | 11.2(9.2-21.1)  | 30.6(24.5-57.4)*    | 47.7(22.0-102.1)*  | <0.01   |
| TNF- $\alpha$ (pg/mL) | 1.8(1.3-15.7)   | 4.6(2.9-7.2)        | 12.1(5.0-21.8)     | 0.14    |
| IL-1 $\beta$ (pg/mL)  | 2.4(2.3-2.9)    | 4.2(2.4-7.9)        | 10.0(2.5-16.4)*    | 0.05    |

443 Data are presented as median (IQR). Kruskal-Wallis (K-W) test; \*P<0.05 vs. UA.

444  
 445 The percentages of CD14<sup>+</sup>HLA-DR<sup>neg/low</sup> cells significantly correlated with circulating levels  
 446 of MMP-9, S100A9/S100A8, IL-6, IL-1 $\beta$ , TNF- $\alpha$ , MPO, and NGAL (Figure 6). Noticeable,  
 447 CD10<sup>neg</sup> neutrophils, which expand proportional to the degree of myocardial injury,  
 448 significantly correlated with levels of MMP-9, S100A9/S100A8, NGAL, MPO, IL-6, and IL-  
 449 1 $\beta$  (Figure 6).

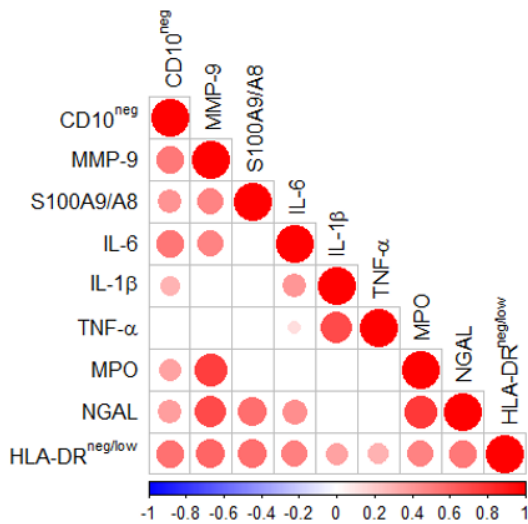

**Figure 6**

450  
 451 **Figure 6.** Spearman-correlation matrix of CD16<sup>+</sup>CD66b<sup>+</sup>CD10<sup>neg</sup> neutrophils (%), CD14<sup>+</sup>HLA-DR<sup>neg/low</sup>  
 452 monocytes (%) and circulating levels of MMP-9, S100A9/S100A8, IL-6, IL-1 $\beta$ , TNF- $\alpha$ , MPO, and NGAL  
 453 (levels). Each circle illustrates a significant correlation between different couples of parameters (P<0.05). The  
 454 correlation coefficient is colored and sized up according to the value; square leaved blank indicates not  
 455 significant correlation.

456 **Elevated circulating levels of IFN- $\gamma$  in cytomegalovirus-seropositive patients with**  
 457 **expanded CD10<sup>neg</sup> neutrophils and increased frequency of CD4<sup>+</sup>CD28<sup>null</sup> T-cells**

458 A crucial role for neutrophils in the orchestration of adaptive immunity is emerging.<sup>15-16</sup> To  
 459 investigate the potential immunoregulatory properties of immature CD10<sup>neg</sup> neutrophils we  
 460 performed flow cytometric immunophenotyping of CD4<sup>+</sup> T-cells and investigated circulating  
 461 levels of IFN- $\gamma$  in a subgroup of patients. Contrary to some reports, circulating levels of naive  
 462 (CCR7<sup>+</sup>CD45RA<sup>+</sup>), central memory (CCR7<sup>+</sup>CD45RA<sup>-</sup>), effector memory (CCR7<sup>-</sup>CD45RA<sup>-</sup>),  
 463 terminally differentiated effector cells (EMRA, CCR7<sup>-</sup>CD45RA<sup>+</sup>) and CD4<sup>+</sup>CD28<sup>null</sup> T-cells  
 464 were not significantly different among patients with ACS (Table 4).  
 465

**Table 4.** CD4<sup>+</sup> T-cells Subsets

|                                                    | <b>UA (n=11)</b> | <b>NSTEMI (n=13)</b> | <b>STEMI (n=34)</b> | <b>P<sub>(K-W)</sub></b> |
|----------------------------------------------------|------------------|----------------------|---------------------|--------------------------|
| NAIVE (n/ $\mu$ L)                                 | 440(338-511)     | 497(328-567)         | 382(312-627)        | n.s.                     |
| CM (n/ $\mu$ L)                                    | 300(233-364)     | 278(242-328)         | 334(210-478)        | n.s.                     |
| EM (n/ $\mu$ L)                                    | 122(91-140)      | 114(86-137)          | 102(80-165)         | n.s.                     |
| EMRA (n/ $\mu$ L)                                  | 55(30-77)        | 42(24-66)            | 47(29-109)          | n.s.                     |
| CD4 <sup>+</sup> CD28 <sup>null</sup> (n/ $\mu$ L) | 4(3-39)          | 5(4-28)              | 10(1-38)            | n.s.                     |

466 Data are presented as median (IQR). NAIVE, CCR7<sup>+</sup>CD45RA<sup>+</sup>; CM, CCR7<sup>+</sup>CD45RA<sup>-</sup>; EM, CCR7<sup>-</sup>CD45RA<sup>-</sup>; EMRA, CCR7<sup>-</sup>CD45RA<sup>+</sup>. Kruskal-  
 467 Wallis (K-W) test; n.s., not significant.  
 468

469 Altered T-cell homeostasis and increased frequencies of circulating CD28<sup>null</sup> T-cells have  
 470 been linked to cytomegalovirus (CMV) seropositivity.<sup>17-19</sup> To study the impact of CMV on  
 471 CD4<sup>+</sup>CD28<sup>null</sup> T-cells frequency, UA, NSTEMI and STEMI patients were stratified according  
 472 to CMV serostatus. We found that CD4<sup>+</sup> T-cells lacking the costimulatory molecule CD28  
 473 showed expansion across all CMV-seropositive (CMV<sup>+</sup>) patients (Figure 7A, 7B). Frequency  
 474 distribution of CD4<sup>+</sup>CD28<sup>null</sup> T-cells (log<sub>10</sub> transformed to improve visualization) appeared  
 475 bimodal and analyzing separately in CMV<sup>+</sup> and CMV-seronegative (CMV<sup>-</sup>) patients, the  
 476 median was significantly higher by a factor 14.1 in CMV<sup>+</sup> patients. (Figure 7-figure  
 477 supplement 1A). Moreover, CD4<sup>+</sup>CD28<sup>null</sup> frequency positively correlated with CMV-IgG  
 478 antibody levels (R=0.6, P<10<sup>-5</sup>). Therefore, we believe that the expansion of CD4<sup>+</sup>CD28<sup>null</sup> T-  
 479 cells may not be a direct result of coronary events but appears to be related to the CMV-  
 480 induced immune changes secondary to repeated antigen exposure.

481 We defined expansion of CD4<sup>+</sup>CD28<sup>null</sup> T-cells frequencies a non-parametric, upper outlier  
 482 limit (upper quartile+1.5 $\times$ interquartile range) as previously reported.<sup>17</sup> The subgroup of CMV<sup>-</sup>  
 483 patients with unstable angina was considered as reference group. (Figure 7-figure supplement  
 484 1B). Similarly we derived a cut-off for expansion of CD10<sup>neg</sup> neutrophils but taking as  
 485 reference group the whole cohort of patients with UA since frequency expansion appeared



486 prevalently due to the grade of coronary disease, not to CMV-seropositivity and both  
 487 contributions to cell expansion could not be dissected (Figure 7-figure supplement 1C, 1D)  
 488 Then, in order to highlight relationship among IFN- $\gamma$  levels, CD10<sup>neg</sup> neutrophils, CD4<sup>+</sup> T-cell  
 489 subsets and CMV-seropositivity we performed hierarchical clustering stratifying patients with  
 490 ACS according to the expansion cut-offs above described. This individuated 4 subgroups of  
 491 patients with frequency of CD10<sup>neg</sup> neutrophils ( $\leq 10\%$  or  $>10\%$ ) and frequency of  
 492 CD4<sup>+</sup>CD28<sup>null</sup> T-cells ( $\leq 0.5\%$  or  $>0.5\%$ ). In the derived heatmap IFN- $\gamma$ , CD10<sup>neg</sup> neutrophils,  
 493 CD4<sup>+</sup>CD28<sup>null</sup>, EMRA, and EM CD4<sup>+</sup> T-cells were grouped together showing similar patterns  
 494 (Figure 7-figure supplement 1E), indicating that persistent CMV infection is associated with  
 495 expansion of the effector memory CD4<sup>+</sup> T-cell compartment and higher IFN- $\gamma$  levels in  
 496 patients with increased frequency of CD10<sup>neg</sup> neutrophils.

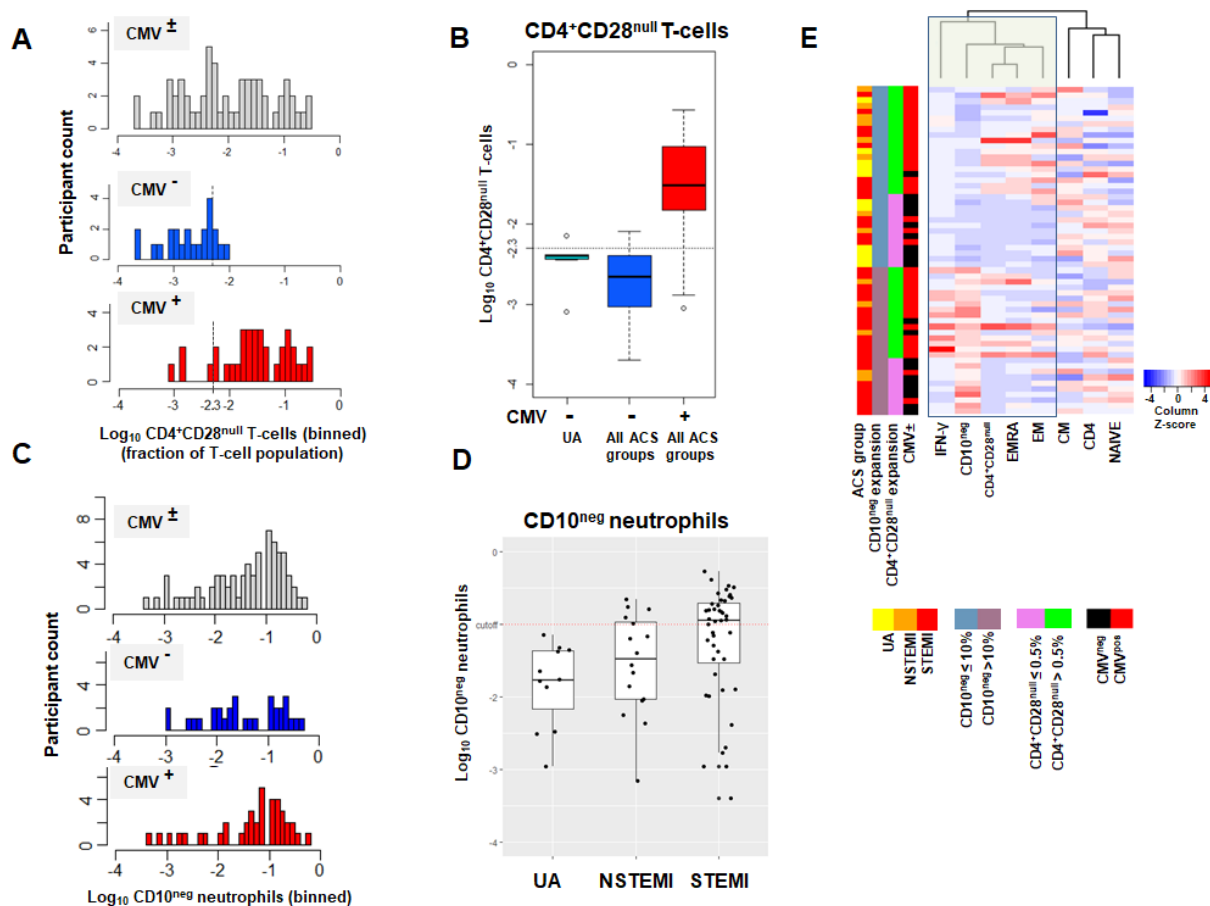

497 **Figure 7-figure supplement 1.** **A** CD4<sup>+</sup>CD28<sup>null</sup> T-cell frequency distribution ( $\log_{10}$ -transformed CD4<sup>+</sup> T-cell  
 498 fractions) of CMV<sup>±</sup> (top, n=58), CMV<sup>-</sup> (middle, n=23) and CMV<sup>+</sup> (bottom, n=35) acute coronary syndrome  
 499 (ACS) patients. CD4<sup>+</sup>CD28<sup>null</sup> T-cells displayed a bimodal distribution related to CMV-seropositivity. **B**  
 500 Boxplots show the  $\log_{10}$ -transformed frequencies of CD4<sup>+</sup>CD28<sup>null</sup> T-cells in CMV<sup>-</sup>-UA, CMV<sup>-</sup> (blue) and  
 501 CMV<sup>+</sup> (red) -ACS patients. Expansion index (dotted line) was calculated as UQ+1.5xIQR of CMV<sup>-</sup>-UA patients  
 502 chosen as reference group. CD4<sup>+</sup>CD28<sup>null</sup> T-cell frequency more than 0.5% was considered as an index of  
 503 expansion; UQ (upper quantile), IQR (inter-quantile range). **C** CD10<sup>neg</sup> neutrophils (CD10<sup>neg</sup>) frequency  
 504 distribution ( $\log_{10}$ -transformed) of CMV<sup>±</sup> (top, n=71), CMV<sup>-</sup> (middle, n=31), and CMV<sup>+</sup> (bottom, n=40) ACS  
 505 patients. **D** Boxplots show the  $\log_{10}$ -transformed frequencies of CD10<sup>neg</sup> in UA, NSTEMI and STEMI patients.  
 506  
 507

508 Expansion index (dotted line) was calculated as  $UQ+1.5 \times IQR$  of UA patients. According, patients with  $CD10^{neg}$   
509 frequency more than 10% had expansion. **E** Scaled frequencies of  $CD4^+CD28^{null}$  T-cells and  $CD10^{neg}$   
510 neutrophils stratified by criteria of cell expansion. Hierarchical clustering performed on columns highlights the  
511 relationship among  $CD10^{neg}$  neutrophils,  $CD4^+CD28^{null}$  T-cells, IFN- $\gamma$  production and CMV seropositivity.  
512

513 To better highlight the relationship among IFN- $\gamma$ ,  $CD10^{neg}$  neutrophils and  $CD4^+CD28^{null}$  T-  
514 cells we also performed principal component analysis (PCA) that showed clustering according  
515 to elevated circulating levels of IFN- $\gamma$ , high levels of  $CD10^{neg}$  neutrophils and peripheral  
516 expansion of  $CD4^+CD28^{null}$  T-cells (Figure 7C). The highest IFN- $\gamma$  levels were found in  
517 STEMI patients with expanded  $CD10^{neg}$  neutrophils (>10%) and increased frequency of  
518  $CD4^+CD28^{null}$  T-cells (Figure 7D). Not surprisingly, when stratified according to CMV  
519 serostatus, maximum levels of circulating IFN- $\gamma$  among ACS patients were detected in CMV-  
520 seropositive STEMI patients displaying increased levels of  $CD10^{neg}$  neutrophils (Figure 7E),  
521 indicating a relation among expansion of immature  $CD10^{neg}$  neutrophils, CMV seropositivity  
522 and strongly enhanced levels of IFN- $\gamma$  in patients with large AMI.

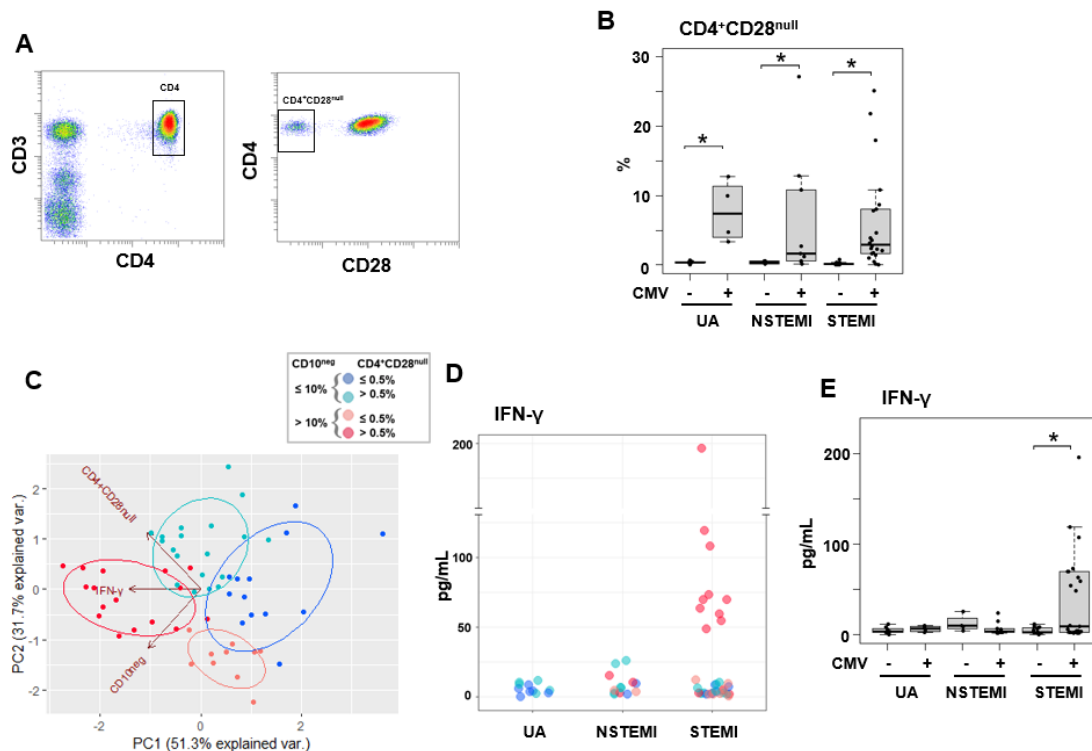

Figure 7

523 **Figure 7. Elevated IFN- $\gamma$  levels in cytomegalovirus-seropositive patients with expanded  $CD10^{neg}$**   
524 **neutrophils and increased frequency of  $CD4^+CD28^{null}$  T-cells.** **A** Gating strategy identifying  $CD4^+CD28^{null}$   
525 T-cells. **B** Frequency of  $CD4^+CD28^{null}$  T-cells in patients with acute coronary syndrome stratified according to  
526 cytomegalovirus (CMV) serostatus. **C** Principal component analysis (PCA) showing clustering according to  
527 circulating levels of IFN- $\gamma$ ,  $CD10^{neg}$  neutrophils and  $CD4^+CD28^{null}$  T-cells and **D** scatter plot showing IFN- $\gamma$   
528 levels according to frequency of  $CD10^{neg}$  neutrophils and  $CD4^+CD28^{null}$  T-cells. Patients were stratified based on  
529 frequency of  $CD10^{neg}$  neutrophils ( $\leq 10\%$  or  $> 10\%$ ) and frequency of  $CD4^+CD28^{null}$  T-cells ( $\leq 0.5\%$  or  $> 0.5\%$ ). **E**  
530 circulating IFN- $\gamma$  levels stratified according to CMV serostatus. UA (n=11), NSTEMI (n=13), and STEMI  
531 (n=34). \* $P \leq 0.05$ .

532 **CD10<sup>neg</sup> neutrophils via induction of interleukin-12 enhance priming for IFN- $\gamma$**   
533 **production by CD4<sup>+</sup> T-cells.**

534 Environmental factors such as CMV infection can induce changes in CD4<sup>+</sup> T-cell phenotype  
535 and function. Consequently, to provide a mechanistic understanding of the cellular basis for  
536 raised IFN- $\gamma$  in CMV-seropositive patients with expanded CD10<sup>neg</sup> neutrophils, we  
537 investigated IFN- $\gamma$  secretion by CD4<sup>+</sup> T-cells isolated from CMV<sup>-</sup>/CMV<sup>+</sup> patients and its  
538 potential link to interleukin 12 (IL-12), potent inducer of IFN- $\gamma$ .<sup>20</sup>

539 In cell-to-cell contact-dependent conditions human neutrophils can mimic myeloid-derived  
540 suppressor cells and suppress T-cell activation through artefactual mechanisms.<sup>21</sup> Therefore,  
541 CD10<sup>neg</sup>/CD10<sup>pos</sup> neutrophils were evaluated for their ability to enhance IFN- $\gamma$  production in  
542 cell contact-independent manner. We found that CD10<sup>neg</sup> neutrophils strongly enhanced IFN-  
543  $\gamma$  and IL-12 production by CD4<sup>+</sup> T-cells from CMV<sup>+</sup> patients (Figure 8A, 8B), when co-  
544 cultured using a transwell system where CD4<sup>+</sup> T-cells in the lower chamber were separated  
545 from neutrophils in the upper chamber. Of note, CD4<sup>+</sup> T-cells equally responded to cell-free  
546 supernatants derived from CD10<sup>neg</sup> neutrophils. IFN- $\gamma$  and IL-12 production were  
547 significantly higher in CD4<sup>+</sup> T-cells from CMV<sup>+</sup> than CMV<sup>-</sup> patients. The addition of  
548 neutralizing anti-IL-12 antibody abrogated the IFN- $\gamma$  production by CD4<sup>+</sup> T-cells from CMV<sup>+</sup>  
549 patients in presence of supernatants derived from CD10<sup>neg</sup> neutrophils (Figure 8B). These data  
550 indicate that CD10<sup>neg</sup> neutrophils release soluble factors into the culture supernatants that  
551 efficiently induce a strong Th1 type response. Further studies aiming at characterizing the  
552 neutrophil-secreted immunomodulatory factors are ongoing.

553 CD10<sup>neg</sup> neutrophils had no effect on CD3/CD28-stimulated CD4<sup>+</sup>CD28<sup>null</sup> T-cells (Figure  
554 8A, 8B), demonstrating that overproduction of IFN- $\gamma$  is confined to CD4<sup>+</sup> T-cells expressing  
555 CD28. Taken together, our findings indicate that CD4<sup>+</sup>CD28<sup>+</sup> T-cells from CMV<sup>+</sup> patients  
556 with AMI display a distinct phenotype overproducing IFN- $\gamma$  in presence of immature  
557 neutrophils via induction of interleukin-12.

558

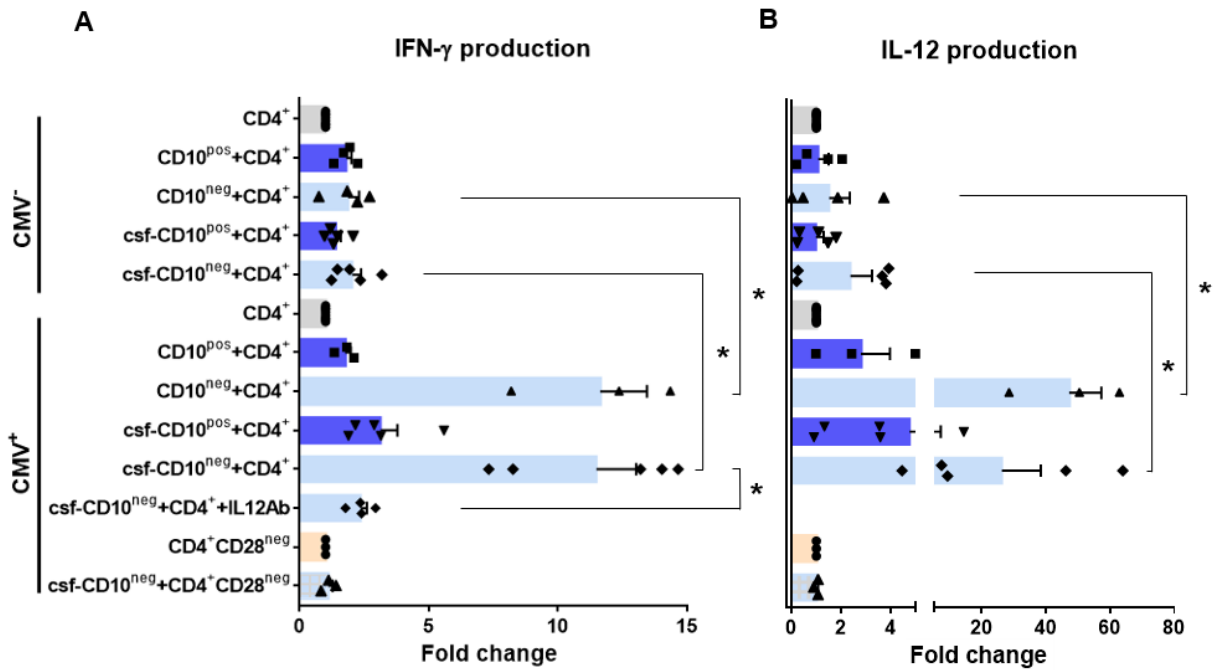

Figure 8

559 **Figure 8. CD10<sup>neg</sup> neutrophils enhance IFN- $\gamma$  production by CD4<sup>+</sup> T-cells via induction of interleukin-12.**  
 560 **A** IFN- $\gamma$  and **B** interleukin-12 production by CD4<sup>+</sup> T-cells stimulated with anti-CD3/CD28 beads and co-cultured  
 561 for 24 hours in absence (CD4<sup>+</sup>) or presence of CD10<sup>pos</sup> neutrophils (CD10<sup>pos</sup>+CD4<sup>+</sup>), CD10<sup>neg</sup> neutrophils  
 562 (CD10<sup>neg</sup>+CD4<sup>+</sup>) using a transwell system or cultured with cell-free supernatants derived from CD10<sup>pos</sup>  
 563 neutrophils (csf-CD10<sup>pos</sup>+CD4<sup>+</sup>), CD10<sup>neg</sup> neutrophils (csf-CD10<sup>neg</sup>+CD4<sup>+</sup>), CD10<sup>neg</sup> neutrophils in the presence  
 564 of neutralizing anti-IL-12 antibody (csf-CD10<sup>neg</sup>+CD4<sup>+</sup>+IL12Ab). CD4<sup>+</sup>CD28<sup>null</sup> T-cells were stimulated with  
 565 anti-CD3/CD28 beads (CD4<sup>+</sup>CD28<sup>null</sup>) and cultured with cell-free supernatants derived from CD10<sup>neg</sup> neutrophils  
 566 (csf-CD10<sup>neg</sup>+CD4<sup>+</sup>CD28<sup>null</sup>). CD10<sup>neg</sup>/CD10<sup>pos</sup> neutrophils, CD4<sup>+</sup> T-cells and CD4<sup>+</sup>CD28<sup>null</sup> T-cells were  
 567 isolated from CMV-seronegative (CMV<sup>-</sup>) or CMV-seropositive (CMV<sup>+</sup>) patients with AMI (n=3-5). Data are  
 568 represented as fold-change to respective CD3/CD28 stimulated cells and presented as mean $\pm$ SEM from  
 569 independent experiments. \* $P$ <0.05.

## 570 **DISCUSSION**

571 Innate immune mechanisms play a paramount role during AMI and the functional  
572 heterogeneity of monocytes and neutrophils have been the focus of intensive research in  
573 recent years. This study highlights for the first time that immature  $CD16^+CD66b^+CD10^{neg}$   
574 neutrophils and  $CD14^+HLA-DR^{neg/low}$  monocytes promoting proinflammatory immune  
575 responses expand in the peripheral blood from patients with large AMI. We also show that  
576 immature neutrophils are recruited to the injured myocardium shortly after reperfusion, using  
577 a mouse model of AMI. Furthermore, we found a potential link among increased frequency of  
578 immature  $CD10^{neg}$  neutrophils and elevated IFN- $\gamma$  levels, especially in cytomegalovirus-  
579 seropositive patients with expanded  $CD4^+CD28^{null}$  T-cells. Finally, we could show that  
580  $CD10^{neg}$  neutrophils enhance  $CD4^+$  T-cells IFN- $\gamma$  production by a contact-independent  
581 mechanism involving IL-12.

582

583 This study uncovered that CD10 can be used as a surface marker to identify the immature  
584 neutrophil population that expands and promotes proinflammatory effects in patients suffering  
585 from AMI. We believe that immature  $CD10^{neg}$  neutrophils derive from MI-induced  
586 emergency granulopoiesis. Both mature (segmented) and immature banded neutrophils are  
587 released from the bone marrow presumably to meet the high demand for more neutrophils,  
588 especially in patients with large AMI. Not surprisingly, in our study higher frequency of  
589 circulating  $CD10^{neg}$  neutrophils was associated with increased systemic concentrations of G-  
590 CSF, an essential regulator of neutrophil trafficking from the bone marrow to the blood.<sup>15,16</sup>  
591 Recently, CD10 has been proposed as a marker that distinguishes mature from immature  
592 neutrophils in healthy volunteers receiving G-CSF for stem cell mobilization.<sup>22</sup>

593 Multiple clinical trials have evaluated the use of G-CSF in patients with AMI after successful  
594 revascularization. The majority of these studies found that effective stem cell mobilization  
595 with G-CSF therapy failed to improve left ventricular recovery.<sup>23</sup> Our findings suggest that  
596 the therapeutic benefits of G-CSF therapy after AMI might be compromised due to the release  
597 of immature proinflammatory  $CD10^{neg}$  neutrophils.

598 However, neutrophils may be released from the bone marrow in response to increased  
599 damage-associated molecular patterns such as S100A8/S100A9, secreted from neutrophils as  
600 mediators of sterile inflammation.<sup>24</sup> Of interest, we found that circulating  $CD10^{neg}$  neutrophils  
601 express high amounts of S100A9, indicating that immature neutrophils could be an important  
602 source of this alarmin in patients with AMI.

603 Under inflammatory conditions neutrophils traffic to inflamed tissues as well as to draining  
604 lymph nodes<sup>15,25</sup> modulating T cell-mediated immune responses. Emerging evidence indicates  
605 that immature neutrophils can be T-cell suppressive or do possess T-cell stimulatory  
606 capacities, displaying disease-specific functional plasticity.<sup>15,26</sup> Immunostimulatory immature  
607 CD10<sup>neg</sup> neutrophils appear in the circulation of G-CSF-treated healthy volunteers and  
608 contact-dependent mechanisms account for their immunoregulatory functions.<sup>22</sup> Here we  
609 provide mechanistic evidence that immature CD10<sup>neg</sup> neutrophils from patients with AMI, in  
610 a contact-independent way involving IL-12, enhance priming for IFN- $\gamma$  production in  
611 activated CD4<sup>+</sup> T-cells. Thus, through diverse mechanisms immature CD10<sup>neg</sup> neutrophils  
612 may exert immunostimulatory/proinflammatory functions actively participating in the  
613 regulation of adaptive immunity.

614 Genetic and environmental factors shape the immune system over time. Several studies have  
615 demonstrated that persistent CMV infection is associated with changes in T-cell phenotype  
616 and function.<sup>27-29</sup> Our results highlight that CD4<sup>+</sup>CD28<sup>+</sup> T-cells from CMV-seropositive AMI  
617 patients are skewed toward a Th1 phenotype, producing large amounts of IFN- $\gamma$  in presence  
618 of CD10<sup>neg</sup> neutrophils. However, results obtained *in vitro* cannot be translated directly to the  
619 *in vivo* situation and several cellular and molecular mechanisms could have led to increased  
620 circulating levels of the pleiotropic cytokine IFN- $\gamma$  after AMI. Notably, using bioinformatic  
621 tools (PCA and hierarchical clustering) we were able to highlight the tight relationship among  
622 the peripheral expansion of immature CD10<sup>neg</sup> neutrophils, CMV-altered CD4<sup>+</sup> T-cell  
623 homeostasis and high levels of IFN- $\gamma$  in patients with large AMI. Thus, determination of  
624 circulating CD10<sup>neg</sup> neutrophils levels, particularly in the context of persistent CMV infection,  
625 might help to identify patients at risk for excessive inflammatory immune response.

626 Although a pathogenetic role of CD4<sup>+</sup>CD28<sup>null</sup> T-cells in coronary artery disease and  
627 atherogenesis have been recognized, important issues have remained unresolved.<sup>30</sup> A recent  
628 study revealed complex associations between CD4<sup>+</sup>CD28<sup>null</sup> T-cells and cardiovascular  
629 disease.<sup>31</sup> CD4<sup>+</sup>CD28<sup>null</sup> T cells are associated with a lower risk for first-time coronary events  
630 in a population-based cohort. In contrast, in patients with advanced atherosclerotic disease an  
631 increased frequency of CD4<sup>+</sup>CD28<sup>null</sup> T-cells was associated with more frequent major  
632 adverse cardiovascular events.<sup>31</sup> Our findings point to a potential link between CMV induced  
633 immune alterations following repeated antigen exposure and the peripheral expansion of  
634 CD4<sup>+</sup>CD28<sup>null</sup> T-cells in ACS patients. CMV has been associated with atherosclerosis and  
635 increased risk for cardiovascular diseases. Recent clinical data showed that myocardial



636 ischemia in CMV-seropositive patients leads to significant changes in the composition of the  
637 CD8<sup>+</sup> T-cell repertoire, accelerating immunosenescence.<sup>32</sup>

638

639 In spite of numerous studies on polymorphonuclear myeloid cells the presence and  
640 functional characteristics of immature neutrophils is underexplored in the setting of AMI in  
641 mice. The present study demonstrated for the first time that CD101 can be used as a marker to  
642 define the maturation status of neutrophils mobilized into the peripheral blood in response to  
643 ischemia and recruited to sites of ischemic injury after reperfusion. Previous studies in a  
644 human model of experimental endotoxemia showed that banded neutrophils exhibit efficient  
645 migration to sites of infection.<sup>33</sup> Moreover, developmental analysis of bone marrow  
646 neutrophils revealed that immature neutrophils are recruited to the periphery of tumor-bearing  
647 mice.<sup>14</sup> Of note, we found that immature CD101<sup>neg</sup> neutrophils are released into the  
648 bloodstream within minutes after reperfusion and are capable of efficient migration to  
649 ischemic tissues, displaying increased expression of MMP-9 and IL-1 $\beta$  at 3 and 24 hours after  
650 reperfusion, respectively. There are significant differences between mouse and human  
651 immunology and the transit time of leukocytes may be quite different.<sup>34-36</sup> During  
652 homeostasis, trafficking of neutrophils/myeloid cells from bone marrow into the circulation  
653 takes between 1–2 days in mice and 5-8 days in humans.<sup>35</sup> Such differences should be  
654 considered when comparing animal and human studies on immune mechanisms underlying  
655 wound healing.

656 The recruitment of immune cells to sites of tissue repair is a complex highly regulated  
657 process involving cytokines, chemokines, and interactions between infiltrating immune cells.  
658 HLA-DR<sup>neg/low</sup> monocytes from patients with AMI are not immunosuppressive but express  
659 high amounts of IL1R1. Thus, immature neutrophils, as an important source of IL-1 $\beta$  in the  
660 reperfused heart, may be actively involved in the recruitment of HLA-DR<sup>neg/low</sup> cells. Saxena  
661 *et al.*<sup>37</sup> showed that IL1R1 signaling mediates early recruitment of Ly6C<sup>hi</sup> monocytes to the  
662 infarcted myocardium. Reperfused myocardial infarction had intense infiltration with Ly6C<sup>hi</sup>  
663 monocytes expressing IL1R1 that peaked after 24 hours of reperfusion.<sup>37</sup> Noteworthy, recent  
664 studies demonstrated that the failing human heart also contains HLA-DR<sup>neg/low</sup> monocytes.<sup>11</sup>

665 Several immune mechanisms operate during cardiac wound healing and IFN- $\gamma$  plays  
666 different roles depending on the cellular and microenvironmental context intrinsically linked  
667 to the stages of ischemic injury. By integrating cell sorting and *in vitro* experiments we found  
668 that macrophages differentiated from HLA-DR<sup>neg/low</sup> monocytes produced more TNF- $\alpha$ , IL-6,  
669 and IL-1 $\beta$  upon IFN- $\gamma$  stimulation as HLA-DR<sup>high</sup> monocyte-derived macrophages. These



670 findings may support a role for HLA-DR<sup>neg/low</sup> monocytes in pathogenic mechanisms  
671 operating during AMI and may, at least in part, explain why an expansion of circulating HLA-  
672 DR<sup>neg/low</sup> monocytes correlates with circulating levels of TNF- $\alpha$ , IL-6, and IL-1 $\beta$ .

673 The interleukin-1 pathway plays a key role in post-MI inflammation and the progression to  
674 heart failure.<sup>38</sup> Our *in vitro* mechanistic experiments with immune cells from AMI patients as  
675 well as mouse studies provide a potential linkage between the induction of immature CD10<sup>neg</sup>  
676 neutrophils/HLA-DR<sup>neg/low</sup> monocytes and increased interleukin-1 activity during AMI.  
677 Emerging evidences highlight that targeting interleukin-1 may hold promise for patients after  
678 MI.<sup>39</sup> In STEMI patients the interleukin-1 receptor antagonist anakinra significantly reduced  
679 the systemic inflammatory response. Moreover, in the CANTOS trial, administration of  
680 canakinumab (a monoclonal antibody targeting IL-1 $\beta$ ) prevented the recurrence of ischemic  
681 events, reduced heart failure-related hospitalizations and mortality in patients with prior  
682 AMI.<sup>39</sup>

683

684 In conclusion, this study shows that immature CD10<sup>neg</sup> neutrophils and CD14<sup>+</sup>HLA-DR<sup>lo/neg</sup>  
685 monocytes expand in patients with AMI and highlights their potential role as triggers of  
686 immune/inflammatory dysregulation after ischemic injury.

687 These findings could have major implications for understanding immunoregulatory  
688 mechanisms operating during AMI and for the development of future therapeutic strategies.  
689 Nevertheless, further studies deciphering the relationship between elevated CD14<sup>+</sup>HLA-  
690 DR<sup>lo/neg</sup> monocytes/CD10<sup>neg</sup> neutrophils and ensuing mortality and morbidity after ischemic  
691 injury are necessary and ongoing.

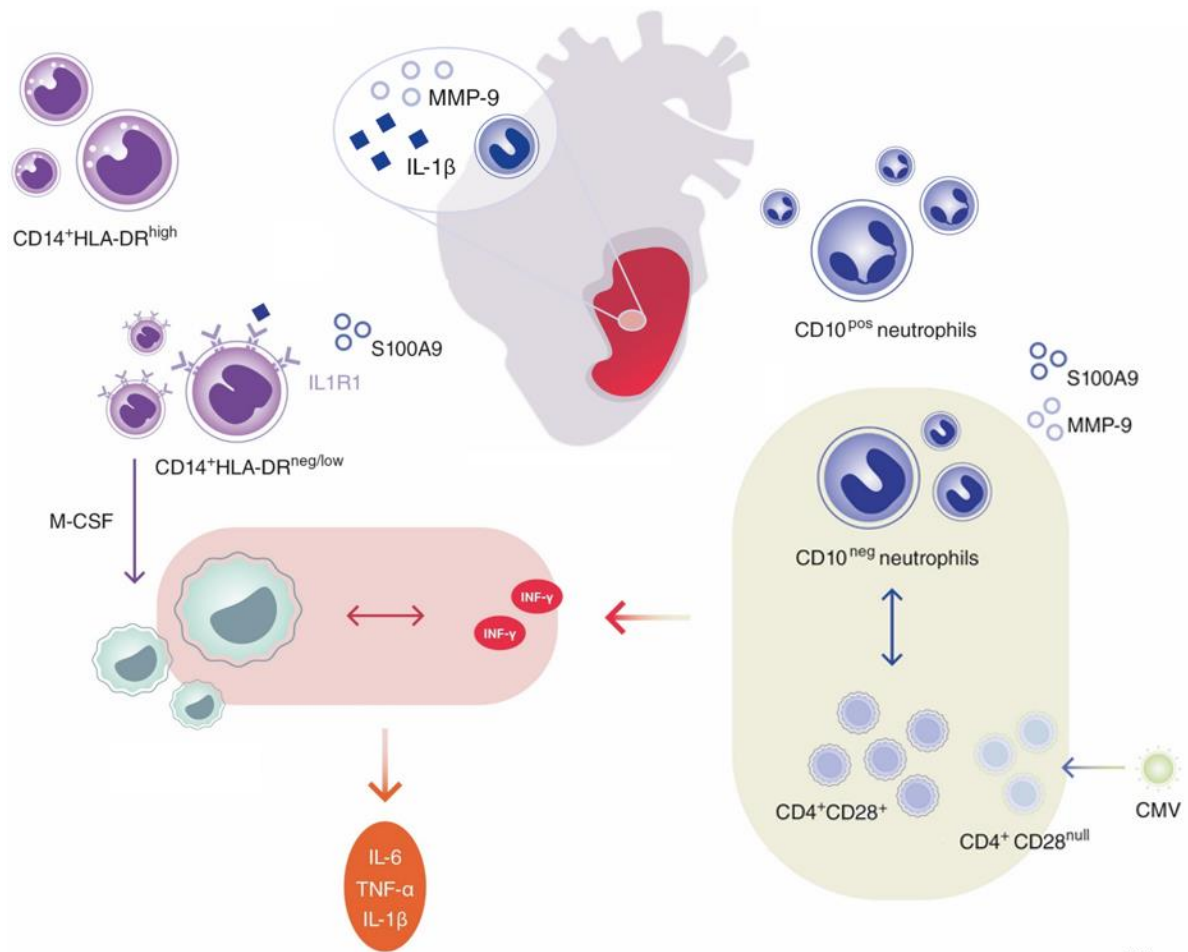

**Figure 9**

692 **Figure 9.** Immature CD10<sup>neg</sup> neutrophils and HLA-DR<sup>neg/low</sup> monocytes inducing proinflammatory and adaptive  
693 immune responses emerge in patients with large acute myocardial infarction.

694 **Acknowledgments**

695 We are grateful for the support of Dr Matthias Ballmaier from the Central Research Facility  
696 Cell Sorting of the Hannover Medical School.

697

698 **Sources of Funding**

699 D. Fraccarollo and J. Bauersachs received support from the Deutsche  
700 Forschungsgemeinschaft (BA 1742/8-1).

701

702 **Competing interests**

703 The authors declare that no competing interests exist.

704 **Data Availability Statement**

705 All data generated or analysed during this study are included in the manuscript and supporting  
706 files.

707

708 **References**

- 709 1. Heusch G, Gersh B. The pathophysiology of acute myocardial infarction and strategies of  
710 protection beyond reperfusion: a continual challenge. *Eur Heart J* 2017;38(11):774-784.
- 711 2. Gabrilovich D, Nagaraj S. Myeloid-derived suppressor cells as regulators of the immune  
712 system. *Nat Rev Immunol* 2009;9:162-174.
- 713 3. Silvin A, Chapuis N, Dunsmore G, Goubet A-G, Dubuisson A, Derosa L, Almire C,  
714 Hénon C, Kosmider O, Droin N, Rameau P, Catelain C, Alfaro A, Dussiau C, Friedrich  
715 C, Sourdeau E, Marin N, Szwebel T-A, Cantin D, Mouthon L, Borderie D, Deloger M,  
716 Bredel D, Mouraud S, Drubay D, Andrieu M, Lhonneur A-S, Saada V, Stoclin A,  
717 Willekens C, Pommeret F, Griscelli F, Ng LG, Zhang Z, Bost P, Amit I, Barlesi F,  
718 Marabelle A, Pène F, Gachot B, André F, Zitvogel L, Ginhoux F, Fontenay M, Solary E.  
719 Elevated Calprotectin and Abnormal Myeloid Cell Subsets Discriminate Severe from  
720 Mild COVID-19. *Cell* 2020;182:1401-1418.
- 721 4. Schulte-Schrepping J, Reusch N, Paclik D, Bassler K, Schlickeiser S, Zhang B, Kramer  
722 B, Krammer T, Brumhard S, Bonaguro L, De Domenico E, Wendisch D, Grasshoff M,  
723 Kapellos TS, Beckstette M, Pecht T, Saglam A, Dietrich O, Mei HE, Schulz AR, Conrad  
724 C, Kunkel D, Vafadarnejad E, Xu CJ, Horne A, Herbert M, Drews A, Thibeault C,  
725 Pfeiffer M, Hippenstiel S, Hocke A, Muller-Redetzky H, Heim KM, Machleidt F, Uhrig  
726 A, Bosquillon de Jarcy L, Jurgens L, Stegemann M, Glosenkamp CR, Volk HD, Goffinet

- 727 C, Landthaler M, Wyler E, Georg P, Schneider M, Dang-Heine C, Neuwinger N, Kappert  
728 K, Tauber R, Corman V, Raabe J, Kaiser KM, Vinh MT, Rieke G, Meisel C, Ulas T,  
729 Becker M, Geffers R, Witzernath M, Drosten C, Suttorp N, von Kalle C, Kurth F,  
730 Handler K, Schultze JL, Aschenbrenner AC, Li Y, Nattermann J, Sawitzki B, Saliba AE,  
731 Sander LE. Severe COVID-19 Is Marked by a Dysregulated Myeloid Cell Compartment.  
732 *Cell* 2020;182:1419-1440.
- 733 5. Haghikia A, Li XS, Liman TG, Bledau N, Schmidt D, Zimmermann F, Krankel N,  
734 Widera C, Sonnenschein K, Weissenborn K, Fraccarollo D, Heimesaat MM, Bauersachs  
735 J, Wang Z, Zhu W, Bavendiek U, Hazen SL, Endres M, Landmesser U. Gut Microbiota-  
736 Dependent Trimethylamine N-Oxide Predicts Risk of Cardiovascular Events in Patients  
737 With Stroke and Is Related to Proinflammatory Monocytes. *Arterioscler Thromb Vasc*  
738 *Biol* 2018;38:2225-2235.
- 739 6. Murray PJ, Allen JE, Biswas SK, Fisher EA, Gilroy DW, Goerdt S, Gordon S, Hamilton  
740 JA, Ivashkiv LB, Lawrence T, Locati M, Mantovani A, Martinez FO, Mege JL, Mosser  
741 DM, Natoli G, Saeij JP, Schultze JL, Shirey KA, Sica A, Suttles J, Udalova I, van  
742 Ginderachter JA, Vogel SN, Wynn TA. Macrophage activation and polarization:  
743 nomenclature and experimental guidelines. *Immunity* 2014;41:14-20.
- 744 7. Fraccarollo D, Thomas S, Scholz CJ, Hilfiker-Kleiner D, Galuppo P, Bauersachs J.  
745 Macrophage Mineralocorticoid Receptor Is a Pleiotropic Modulator of Myocardial Infarct  
746 Healing. *Hypertension* 2019;73:102-111.
- 747 8. Galuppo P, Vettorazzi S, Hovelmann J, Scholz CJ, Tuckermann JP, Bauersachs J,  
748 Fraccarollo D. The glucocorticoid receptor in monocyte-derived macrophages is critical  
749 for cardiac infarct repair and remodeling. *FASEB J* 2017;31:5122-5132.
- 750 9. Fraccarollo D, Galuppo P, Bauersachs J. Modeling Cardiac Fibrosis in Mice:  
751 (Myo)Fibroblast Phenotype After Ischemia. *Methods Mol Biol* 2017;1627:123-137.
- 752 10. Fraccarollo D, Berger S, Galuppo P, Kneitz S, Hein L, Schutz G, Frantz S, Ertl G,  
753 Bauersachs J. Deletion of cardiomyocyte mineralocorticoid receptor ameliorates adverse  
754 remodeling after myocardial infarction. *Circulation* 2011;123:400-8.
- 755 11. Bajpai G, Schneider C, Wong N, Bredemeyer A, Hulsmans M, Nahrendorf M, Epelman  
756 S, Kreisel D, Liu Y, Itoh A, Shankar T, Selzman C, Drakos S, Lavine K. The human  
757 heart contains distinct macrophage subsets with divergent origins and functions. *Nat Med*  
758 2018;24:1234-1245.

- 759 12. Hardisty G, Llanwarne F, Minns D, Gillan J, Davidson D, Findlay E, Gray R. Ultra-pure  
760 isolation of low density neutrophils casts doubt on their exceptionality in health and  
761 disease. *bioRxiv* 2020:2020.06.17.156588.
- 762 13. Kalled SL, Siva N, Stein H, Reinherz EL. The distribution of CD10 (NEP 24.11,  
763 CALLA) in humans and mice is similar in non-lymphoid organs but differs within the  
764 hematopoietic system: absence on murine T and B lymphoid progenitors. *Eur J Immunol*  
765 1995;25:677-87.
- 766 14. Evrard M, Kwok IWH, Chong SZ, Teng KWW, Becht E, Chen J, Sieow JL, Penny HL,  
767 Ching GC, Devi S, Adrover JM, Li JLY, Liong KH, Tan L, Poon Z, Foo S, Chua JW, Su  
768 IH, Balabanian K, Bachelerie F, Biswas SK, Larbi A, Hwang WYK, Madan V, Koeffler  
769 HP, Wong SC, Newell EW, Hidalgo A, Ginhoux F, Ng LG. Developmental Analysis of  
770 Bone Marrow Neutrophils Reveals Populations Specialized in Expansion, Trafficking,  
771 and Effector Functions. *Immunity* 2018;48:364-379.
- 772 15. Costa S, Bevilacqua D, Cassatella MA, Scapini P. Recent advances on the crosstalk  
773 between neutrophils and B or T lymphocytes. *Immunology* 2019;156:23-32.
- 774 16. Silvestre-Roig C, Braster Q, Ortega-Gomez A, Soehnlein O. Neutrophils as regulators of  
775 cardiovascular inflammation. *Nature Reviews Cardiology* 2020;17:327-340.
- 776 17. Pera A, Caserta S, Albanese F, Blowers P, Morrow G, Terrazzini N, Smith HE, Rajkumar  
777 C, Reus B, Msonda JR, Verboom M, Hallensleben M, Blasczyk R, Davies KA, Kern F.  
778 CD28(null) pro-atherogenic CD4 T-cells explain the link between CMV infection and an  
779 increased risk of cardiovascular death. *Theranostics* 2018;8:4509-4519.
- 780 18. Looney RJ, Falsey A, Campbell D, Torres A, Kolassa J, Brower C, McCann R, Menegus  
781 M, McCormick K, Frampton M, Hall W, Abraham GN. Role of cytomegalovirus in the T  
782 cell changes seen in elderly individuals. *Clin Immunol* 1999;90:213-9.
- 783 19. Moro-Garcia MA, Lopez-Iglesias F, Marcos-Fernandez R, Bueno-Garcia E, Diaz-Molina  
784 B, Lambert JL, Suarez-Garcia FM, Moris de la Tassa C, Alonso-Arias R. More intensive  
785 CMV-infection in chronic heart failure patients contributes to higher T-lymphocyte  
786 differentiation degree. *Clin Immunol* 2018;192:20-29.
- 787 20. Trinchieri G. Interleukin-12 and the regulation of innate resistance and adaptive  
788 immunity. *Nat Rev Immunol* 2003;3:133-46.
- 789 21. Negorev D, Beier UH, Zhang T, Quatromoni JG, Bhojnagarwala P, Albelda SM, Singhal  
790 S, Eruslanov E, Lohoff FW, Levine MH, Diamond JM, Christie JD, Hancock WW,  
791 Akimova T. Human neutrophils can mimic myeloid-derived suppressor cells (PMN-

- 792 MDSC) and suppress microbead or lectin-induced T cell proliferation through artefactual  
793 mechanisms. *Sci Rep* 2018;8:3135.
- 794 22. Marini O, Costa S, Bevilacqua D, Calzetti F, Tamassia N, Spina C, De Sabata D, Tinazzi  
795 E, Lunardi C, Scupoli MT, Cavallini C, Zoratti E, Tinazzi I, Marchetta A, Vassanelli A,  
796 Cantini M, Gandini G, Ruzzenente A, Guglielmi A, Missale F, Vermi W, Tecchio C,  
797 Cassatella MA, Scapini P. Mature CD10(+) and immature CD10(-) neutrophils present in  
798 G-CSF-treated donors display opposite effects on T cells. *Blood* 2017;129:1343-1356.
- 799 23. Traverse JH. G-CSF's Last Stand in STEMI. *Circ Res* 2019;125(3):307-308.
- 800 24. Sreejit G, Abdel-Latif A, Athmanathan B, Annabathula R, Dhyani A, Noothi SK, Quaife-  
801 Ryan GA, Al-Sharea A, Pernes G, Dragoljevic D, Lal H, Schroder K, Hanaoka BY,  
802 Raman C, Grant MB, Hudson JE, Smyth SS, Porrello ER, Murphy AJ, Nagareddy PR.  
803 Neutrophil-Derived S100A8/A9 Amplify Granulopoiesis After Myocardial Infarction.  
804 *Circulation* 2020;141:1080-1094.
- 805 25. Leliefeld PH, Koenderman L, Pillay J. How Neutrophils Shape Adaptive Immune  
806 Responses. *Front Immunol* 2015;6:471.
- 807 26. Rahman S, Sagar D, Hanna RN, Lightfoot YL, Mistry P, Smith CK, Manna Z, Hasni S,  
808 Siegel RM, Sanjuan MA, Kolbeck R, Kaplan MJ, Casey KA. Low-density granulocytes  
809 activate T cells and demonstrate a non-suppressive role in systemic lupus erythematosus.  
810 *Annals of the Rheumatic Diseases* 2019;78:957-966.
- 811 27. Nikolich-Zugich J. Ageing and life-long maintenance of T-cell subsets in the face of  
812 latent persistent infections. *Nat Rev Immunol* 2008;8:512-22.
- 813 28. Wertheimer AM, Bennett MS, Park B, Uhrlaub JL, Martinez C, Pulko V, Currier NL,  
814 Nikolich-Zugich D, Kaye J, Nikolich-Zugich J. Aging and cytomegalovirus infection  
815 differentially and jointly affect distinct circulating T cell subsets in humans. *J Immunol*  
816 2014;192:2143-55.
- 817 29. Davenport MP, Smith NL, Rudd BD. Building a T cell compartment: how immune cell  
818 development shapes function. *Nat Rev Immunol* 2020;20:499-506.
- 819 30. Dumitriu IE, Araguás ET, Baboonian C, Kaski JC. CD4+CD28null T cells in coronary  
820 artery disease: when helpers become killers. *Cardiovascular Research* 2008;81:11-19.
- 821 31. Tomas L, Bengtsson E, Andersson L, Badn W, Tengryd C, Persson A, Edsfeldt A,  
822 Nilsson P, Schiopu A, Nilsson J, Gonçalves I, Björkbacka H. Low Levels of  
823 CD4+CD28null T Cells at Baseline Are Associated With First-Time Coronary Events in  
824 a Prospective Population-Based Case-Control Cohort. *Arteriosclerosis, Thrombosis, and*  
825 *Vascular Biology* 2020;40:426-436.



- 826 32. Hoffmann J, Shmeleva EV, Boag SE, Fiser K, Bagnall A, Murali S, Dimmick I, Pircher  
827 H, Martin-Ruiz C, Egred M, Keavney B, Zglinicki Tv, Das R, Todryk S, Spyridopoulos I.  
828 Myocardial Ischemia and Reperfusion Leads to Transient CD8 Immune Deficiency and  
829 Accelerated Immunosenescence in CMV-Seropositive Patients. *Circulation Research*  
830 2015;116:87-98.
- 831 33. van Grinsven E, Textor J, Hustin LSP, Wolf K, Koenderman L, Vrisekoop N. Immature  
832 Neutrophils Released in Acute Inflammation Exhibit Efficient Migration despite  
833 Incomplete Segmentation of the Nucleus. *The Journal of Immunology* 2019;202:207-217.
- 834 34. Javier M, Hughes H. Of Mice and Not Men: Differences between Mouse and Human  
835 Immunology. *Journal of immunology* 2004;172:2731-2738.
- 836 35. Mackey JBG, Coffelt SB, Carlin LM. Neutrophil Maturity in Cancer. *Frontiers in*  
837 *Immunology* 2019;10.1912.
- 838 36. Riehle C, Bauersachs J. Small animal models of heart failure. *Cardiovasc Res*  
839 2019;115:1838-1849.
- 840 37. Saxena A, Chen W, Su Y, Rai V, Uche OU, Li N, Frangogiannis NG. IL-1 Induces  
841 Proinflammatory Leukocyte Infiltration and Regulates Fibroblast Phenotype in the  
842 Infarcted Myocardium. *The Journal of Immunology* 2013;191:4838-4848.
- 843 38. Abbate A, Toldo S, Marchetti C, Kron J, Tassell BWV, Dinarello CA. Interleukin-1 and  
844 the Inflammasome as Therapeutic Targets in Cardiovascular Disease. *Circulation*  
845 *Research* 2020;126:1260-1280.
- 846 39. Buckley LF, Abbate A. Interleukin-1 blockade in cardiovascular diseases: a clinical  
847 update. *European Heart Journal* 2018;39:2063-2069.
